1 **Title: Cryo-EM structure of an elusive pre-transport intermediate of the multidrug**  
2 **transporter BmrCD reveals modes of asymmetric drug binding**

3  
4 **Authors:** Tarjani M. Thaker<sup>1\*</sup>, Smriti Mishra<sup>2\*</sup>, Wenchang Zhou<sup>3</sup>, Jose D. Faraldo-  
5 Gomez<sup>3</sup>, Hassane Mchaourab<sup>2,#</sup>, Thomas M. Tomasiak<sup>1,#</sup>

6 **Affiliations:**

7 <sup>1</sup>Department of Chemistry and Biochemistry, University of Arizona, Tucson, AZ, USA

8 <sup>2</sup>Department of Molecular Physiology and Biophysics, Vanderbilt University, Nashville,  
9 TN, USA

10 <sup>3</sup>Theoretical Molecular Biophysics Laboratory, National Heart, Lung, and Blood Institute,  
11 National Institutes of Health, 50 South Drive, Bethesda, MD 20892, USA

12 \*These authors contributed equally to this work

13 #Correspondence to: [tomasiak@arizona.edu](mailto:tomasiak@arizona.edu); [hassane.mchaourab@vanderbilt.edu](mailto:hassane.mchaourab@vanderbilt.edu)

14  
15 **Abstract:** Vectorial substrate efflux by ATP binding cassette (ABC) transporters, which  
16 play a major role in multidrug resistance, entails the ATP-powered interconversion of the  
17 transporter between stable intermediates. Despite recent progress in structure elucidation  
18 of ABC transporters, a number of such intermediates have yet to be visualized and  
19 mechanistically interpreted. Here, we combine single particle cryo-EM, Double Electron  
20 Electron Resonance (DEER) spectroscopy with Molecular Dynamics simulations to  
21 profile and mechanistically frame the conformation of a hitherto unobserved intermediate  
22 in the context of BmrCD, a heterodimeric multidrug ABC exporter from *Bacillus subtilis*.  
23 In our cryo-EM structure, BmrCD adopts an inward facing architecture bound to both ATP  
24 and the substrate Hoechst-33342 and is capped by an extracellular domain which  
25 undergoes ATP-dependent conformational changes. A striking feature of the structure is  
26 a symmetric arrangement of the nucleotide-binding domain (NBD) in the presence of ATP  
27 whereas binding of Hoechst at two distinct sites in an acidic pocket stabilizes an  
28 asymmetric arrangement of the transmembrane domain architecture (TMD). Mutation of  
29 residues coordinating Hoechst in the structure abrogates the cooperative stimulation of  
30 ATP hydrolysis. In conjunction with previous studies, our findings suggest a mechanistic  
31 role for symmetry mismatch between NBDs and TMDs in the conformational cycle of ABC  
32 transporters. Moreover, the resolved structures of bimodally-bound drugs are of notable  
33 importance for future rational design and optimization of molecules for targeted transport  
34 inhibition of ABC transporters.

35 **One Sentence Summary:** Cryo-EM and EPR analysis reveal cooperative substrate  
36 binding in BmrCD in an architecture primed for transport.

37 ATP binding cassette (ABC) transporters harness the energy of ATP hydrolysis to  
38 traffic molecules across lipid membranes. Ubiquitous in all kingdoms of life, ABC  
39 exporters efflux a spectrum of substrates, most notably cytotoxic drugs<sup>1</sup>. Although the  
40 molecular architecture of ABC transporters invariably has two nucleotide binding domains  
41 (NBD) with two ATP binding sites (also referred to as the nucleotide binding site (NBS))  
42 and two transmembrane domains (TMDs), a subfamily has evolved a catalytically-  
43 impaired NBD. Typically assembled as heterodimers, ABC exporters of this subfamily are  
44 distinguished by an asymmetric duty cycle of the motor domain where ATP hydrolysis is  
45 primarily carried out by the active ATP binding site<sup>1</sup>, also known as the consensus NBS.  
46 The mechanistic implications of the asymmetric ATP turnover continue to be an active  
47 area of investigation.

48 Owing to the widespread application of single particle cryo-EM, the structural  
49 biology of ABC exporters has witnessed rapid advances in the last few years yielding  
50 snapshots of transporters in distinct conformational states. Most notably, a complement  
51 of such states was resolved for a bacterial ABC heterodimer, TmrAB<sup>2</sup>. These included  
52 inward-facing (IF), occluded and outward-facing (OF) conformations, and for the first time  
53 a post-hydrolysis low energy state where asymmetric binding of ATP and ADP was  
54 resolved. Current models of ATP-driven transport posit that ABC transporters rest in an  
55 inward-facing open conformation with NBDs slightly separated for high affinity substrate  
56 and nucleotide binding, though recent studies report nucleotide binding in this architecture  
57 is constitutive at least in exporters<sup>1</sup>. The ATP-substrate-transporter complex is then in a  
58 state favorable for transport once both NBDs are aligned to form an intact ATP hydrolysis  
59 pocket. Conserved loops (Walker A, Walker B, P-loop), present in most ATPases, and  
60 motifs (Q-loop) that are specific only to ABC transporters coordinate the positioning of a  
61 catalytic water by a highly conserved glutamate residue in the Walker B motif resulting in  
62 ATP hydrolysis and the subsequent reset of the transport cycle.

63 Despite the success of the TmrAB investigation in linking intermediates of ATP  
64 hydrolysis to distinct conformations, significant mechanistic gaps remain. One critical gap  
65 pertains to the sequence of events that occur prior to transition to OF conformations after  
66 substrate and ATP binding. Except ABC homodimers, structures of ATP-bound ABC  
67 exporters almost invariably have been obtained in a catalytically-impaired background  
68 where both NBD catalytic glutamates were replaced with glutamines<sup>2-4</sup>. Moreover, these  
69 structures as well as those of ATP-bound TmrAB, capture outward facing or occluded  
70 conformations<sup>3-8</sup>. This has led to a generalized conclusion that ATP binding stabilizes the  
71 OF conformation despite evidence that the stability of such a conformation may be  
72 transporter dependent<sup>9</sup>. Furthermore, prior to this transition, a loaded IF intermediate  
73 bound to substrate and ATP must be postulated. Such an intermediate could be transient  
74 for TmrAB, explaining its absence in the cryo-EM maps.

75 A second, heterodimer-specific mechanistic gap, pertains to the nature of drug  
76 binding. Efforts to sensitize drug-resistant cells to various small molecules and  
77 chemotherapeutics by inhibiting efflux pumps such as heterodimeric ABC transporters  
78 has not yet proven successful<sup>10,11</sup>. In the absence of a detailed understanding of  
79 determinants of transporter/drug interactions, progress on this front remains stalled.  
80 Some insights have emerged from recent structures of P-glycoprotein (Pgp) visualizing  
81 substrates<sup>12</sup> and inhibitors<sup>13</sup> cradled in the vestibule between the TMDs with

82 stoichiometries of one and two per transporter, respectively. In contrast, the peptide  
83 substrate was poorly resolved in TmrAB structures precluding an analysis of the role of  
84 asymmetry in heterodimer substrate recognition, although substrate binding shifted the  
85 equilibrium towards a more open IF conformation<sup>2</sup>.

86 To address these two central mechanistic gaps, we integrated cryo-EM with  
87 Double Electron Electron Resonance (DEER) spectroscopy, Molecular Dynamics (MD)  
88 simulations and biochemical analysis to determine, validate and mechanistically  
89 contextualize a pre-transport, ATP-bound, Hoechst-loaded intermediate of the ABC  
90 heterodimer BmrCD from *Bacillus subtilis*. BmrCD was selected on the basis of previous  
91 DEER analyses demonstrating that the ATP-bound IF intermediate is relatively stable<sup>14,15</sup>.  
92 We further stabilized this intermediate in a catalytically-impaired mutant background  
93 where putative catalytic residues in both NBDs have been replaced with glutamine.  
94 Hoechst is transported by BmrCD in inside-out-vesicles and stimulates ATP turnover of  
95 the purified transporter in detergent micelles and nanodiscs<sup>16</sup>. The transporter structure  
96 adopts an inward-facing conformation characterized by symmetric, yet disengaged  
97 NBDs, but structurally asymmetric transmembrane domains. DEER distributions in the  
98 mutant background reveal that the cryo-EM conformation is a minor population in the  
99 ensemble. Notably, the cryo-EM maps reveal two antiparallel Hoechst molecules bound  
100 in the IF cavity, making contacts primarily with BmrC protomer seemingly reflecting the  
101 internal symmetry of the protein structure. Micro-second MD trajectories are consistent  
102 with this interpretation, and reveal the network of polar and aromatic interactions that  
103 stabilizes both substrate molecules concurrently. The predicted binding mode and  
104 stoichiometry of Hoechst is further interrogated by functional analysis and determination  
105 of Hill coefficients in wild-type (WT) BmrCD. We found that Hoechst-mediated stimulation  
106 of ATP hydrolysis is cooperative, and mutation of residues in contact with the Hoechst  
107 molecules blunts stimulation of ATP hydrolysis. In conjunction with DEER analysis, our  
108 structure integrates a number of recent results and fills in a key gap in the mechanistic  
109 understanding of ATP-coupled conformational dynamics of ABC exporters.

110

## 111 RESULTS

### 112 The structure of BmrCD in the substrate and ATP-bound state adopts an inward- 113 open architecture

114 The structure of BmrCD was determined using single particle cryo-electron  
115 microscopy (**Fig. 1A-C; Table 1; Supp. Fig. 1**) of a Cysteine-less (C-less) BmrCD bearing  
116 glutamine substitution of D500 in BmrC and E592 in BmrD (referred to hereafter as  
117 BmrCD-QQ). The transporter was purified into LMNG micelles which were subsequently  
118 exchanged for digitonin micelles to facilitate orientation distribution on cryo-EM grids (see  
119 methods). BmrCD-QQ for cryo-EM structure determination was pre-saturated with excess  
120 ATP and Hoechst-33342 in order to stabilize the ligand-bound intermediate (see  
121 methods). From a final dataset consisting of nearly 4.3 million, we determined a structure  
122 to 3.5Å resolution from a final subset of 157,021 particles in an inward-facing  
123 conformation where the extracellular side is closed. The topology of the entire architecture  
124 is revealed in sufficient detail to identify the presence of two molecules of the model  
125 substrate Hoechst in a central vestibule of the TMD and a single molecule of ATP in each  
126 NBD (**Fig. 1B, Supp. Fig. 2**). Notably, we resolve the architecture of a TMD insertion in

127 BmrD, between TM2 and TM3, forming an extracellular cap over the extracellular gate of  
128 BmrCD which we define as the BmrCD extracellular domain (ECD) (**Fig. 1D**). Comparison  
129 of the observed geometry to the series of inward-facing structures of the closely related  
130 exporter TmrAB highlights a wider IF architecture in BmrCD with NBDs slightly separated  
131 (**Fig. 2A**) relative to the narrow inward-facing open (IF<sub>narrow</sub>; PDB ID 6raf<sup>17</sup>) (RMSD  
132 5.424 Å) or the inward-facing wide conformation of TmrAB (IF<sub>wide</sub>; PDB ID 6rag<sup>17</sup>; RMSD  
133 3.624 Å), both of which are stabilized by nucleotide binding in the NBS (**Supp. Fig. 3**,  
134 **Supp. Table 2**). In comparison to other prokaryotic exporters of known structure<sup>2,6,18–24</sup>  
135 and related members of the ABCB<sup>3,13,25</sup> and ABCC<sup>4,5</sup> families, BmrCD geometry is most  
136 similar in architecture to the heterodimeric exporter TM287/288 asymmetrically bound to  
137 AMP-PNP in one NBS (PDB ID: 4q4a<sup>22</sup>; RMSD 3.135 Å) (**Supp. Fig. 4, 5**). However, the  
138 conformation of BmrCD is unique in that it is both substrate and ATP-bound yet is inward-  
139 facing.

### 140 **The ATP and Hoechst-bound IF conformation has symmetric but disengaged NBDs**

141 Because previous structures of catalytically impaired ABC transporters have  
142 captured occluded or OF conformations<sup>3,4,6</sup>, we characterized the ensemble of  
143 conformations using DEER distance measurements between pairs of spin labels in the  
144 impaired BmrCD-QQ background for protein solubilized in digitonin and  $\beta$ -DDM micelles.  
145 Consistent with these previous studies, distance distributions in the TMD (spin label pairs  
146 96/188 and 55/146) report a predominantly OF conformation in the presence of Hoechst  
147 and ATP although a minor IF population, which we presume is captured in the cryo-EM  
148 structure, is evident in the distance distributions (**Fig. 1D**). Corresponding DEER  
149 distributions in the WT BmrCD background previously published are shown for  
150 reference<sup>14</sup>.

151 The structure presented here features symmetric NBDs, and NBSs (**Fig. 2A-C**),  
152 consistent with DEER data (**Fig. 2D**). Distance distributions between spin labels  
153 introduced in proximity to the degenerate (348/532) and consensus (440/441) ATP  
154 binding sites for the QQ background are similar to those obtained in the Vanadate-trapped  
155 intermediate of WT BmrCD (**Fig. 2D**). As previously observed for the EQ double mutants  
156 in P-glycoprotein (Pgp)<sup>3</sup>, the D500Q and E592Q mutations present in BmrCD-QQ  
157 abrogate the asymmetry of the NBS observed under turnover conditions (solid green  
158 traces in Figure 2D) in the C-less background. The distance distributions at the NBS pairs  
159 predicted from the structure overlap with those experimentally observed in C-less BmrCD  
160 in the presence of AMP-PNP (dashed green traces in **Figure 2D**). In the structure, the  
161 geometry of ATP binding is also symmetric and adopts nearly identical conformations  
162 (**Fig. 2B,C**). The unambiguous density into which ATP was modeled appears in a  
163 canonical site for nucleotide binding that overlaps with ATP in TmrAB<sup>2</sup> and AMP-PNP in  
164 TM288/287<sup>26</sup>. In this orientation, the Walker A motif stabilizes the  $\beta$ -phosphate of ATP,  
165 whereas the Glutamine residue in place of the catalytic base is oriented towards the  $\gamma$ -  
166 phosphate in both protomers (**Fig. 2C**). Unexpectedly, the NBDs of BmrC of BmrD do not  
167 contact each other, and nucleotide binding is supported entirely by intra-domain  
168 interactions that stabilize ATP within a well-defined cleft. These results support the  
169 following two conclusions: 1) The NBD architecture of our structure is more consistent  
170 with inward-facing open populations of BmrCD that are stabilized by non-hydrolyzable

171 AMP-PNP and 2) this state is more symmetric in the NBDs than in WT BmrCD in the  
172 presence of Hoechst and ATP.

### 173 **Architecture and ATP-dependent dynamics of the ECD domain**

174 A unique feature that distinguishes BmrCD from other biochemically-characterized  
175 ABC exporters, is the presence of an insertion between transmembrane helix 1 (TM1)  
176 and transmembrane helix 2 (TM2), which we define as the extracellular domain (ECD).  
177 Electron Potential Density corresponding to the ECD reveals a primarily  $\beta$ -stranded  
178 domain consisting of two approximate subdomains (**Fig. 1D; 3A**). The ECD is positioned  
179 in an orientation that results in extensive interactions with the TMD thereby occluding the  
180 extracellular TMD bundle of both BmrC and BmrD. Analysis of the electrostatic  
181 distribution over the surface of the ECD and at ECD/TMD interface further reveal both  
182 acidic and basic patches that extend into the TMD (**Fig. 3B,C**). Notably, an acidic stretch  
183 of residues extends from the ECD to the BmrC TMD; whereas, the ECD/TMD interface in  
184 BmrD is marked by a basic stretch. Somewhat surprising is the formation of a solvent  
185 accessible, acidic cavity in the ECD. Binding of both Hoechst molecules in the BmrCD  
186 TMD is observed in a similarly acidic vestibule (see below), suggesting translocation of  
187 substrate through the TMD may proceed via interaction with and rearrangement of the  
188 ECD.

189 We tested the notion of a functional role for the ECD by measuring distances  
190 between a spin label on this domain (BmrD 126) relative to the two spin labels monitoring  
191 the extracellular packing of BmrC (55) and BmrD (146) (**Fig. 3D**). The ECD/BmrC  
192 interface site (46/126) undergoes a large amplitude distance opening in the high-energy  
193 post hydrolysis state (red traces in **Figure 3**). Similarly, the 55/126 pair report a large  
194 distance change as would be expected if the ECD moved in concert with BmrD. On the  
195 other hand, we observed a small distance change between the BmrD TMD (146) and the  
196 ECD (126) suggesting ATP-coupled rearrangement of this domain within the BmrD  
197 protomer.

### 198 **The ATP and Hoechst-bound IF conformation features asymmetry of the** 199 **transmembrane domain**

200 Similar to TmrAB and TM287/288, BmrC and BmrD come together to form a  
201 vestibule presumably to enable substrate binding. However, this assembly is asymmetric  
202 in the TMD of BmrCD (**Supp. Table 1**). Superposition of the BmrD TMD onto the BmrC  
203 TMD by rotation around the pseudosymmetric axis of the TMD dimer highlights an  
204 outward shift of nearly every TM in BmrC relative to BmrD on the extracellular side (**Fig.**  
205 **4A**). The arrangement of the intracellular side of the TMD bundle is similarly marked by  
206 a concerted outward movement of all BmrC TM helices relative to BmrD. The intracellular  
207 side also exhibits the most substantial reorientations, specifically of TM3, 4, and 6 in BmrC  
208 which shift away from the substrate binding cavity by  $\sim 4\text{\AA}$  relative to BmrD. The presence  
209 of several  $\pi$ -helices along the TMD bundle likely accommodates the independent  
210 movement of the TMD helices on the two sides of the membrane leaflet.

211 Comparison of the pseudosymmetric arrangement of the TMD in BmrCD to TmrAB  
212 TMD highlights similarities to wild-type TmrAB in the nucleotide-bound wide state (PDB  
213 ID: 6rag<sup>2</sup>) and the EQ variant in the apo state (PDB ID: 6ran<sup>2</sup>) (**Supp. Table 2**). Even in  
214 these related architectures, substantial differences are observed in nearly every TM of

215 BmrD compared to TmrA, the equivalent canonical chain in TmrAB. Comparison of the  
216 TMD geometry to inward-open architectures observed in related ABC exporters further  
217 highlights the asymmetry of the BmrCD TMD halves (**Supp. Fig. 5**). The structures of  
218 both apo and AMP-PNP-bound TM287/288 bear the strongest resemblance to the  
219 BmrCD TMD geometry<sup>22,27</sup>. Superposition of each half independently reveals nearly  
220 identical bundles in BmrC and TM287, both of which contain the non-canonical NBS and  
221 is the site of bound nucleotide in both structures (AMP-PNP in TM287). However, a  
222 comparison between the homologous BmrD and TM288 chains reveals a smaller  
223 interhelical angle between TM4/TM6 in BmrD (~50°) than in BmrC or TM287/TM288  
224 (~60°). These differences could be due to interactions between the BmrD ECD and TMD  
225 bundle, or to the unique features of substrate binding in the BmrCD TMD.

### 226 **Asymmetric binding sites of two Hoechst molecules in the TMD**

227 Remarkably, density was observed in the TMD vestibule that is able to  
228 accommodate the assignment of not just one but two molecules of Hoechst. Calculation  
229 of a cross-correlation score was used to rationalize a parallel or antiparallel arrangement  
230 of the two molecules, with the latter scoring higher (0.65 (antiparallel) versus 0.60  
231 (parallel)) and thus supporting an antiparallel assignment. Notably, the TMD substrate  
232 densities exhibit an asymmetric positioning relative to the pseudosymmetric axis of the  
233 TMD (**Fig. 4B**), matching the asymmetry of the TMDs. The Hoechst molecules bind in an  
234 opposite orientation to each other, an arrangement similar to the Pgp inhibitors  
235 zosuquidar and tariquidar in Pgp<sup>28,29</sup>. The Hoechst binding pockets are on each side of a  
236 secondary pseudosymmetric two-fold axis relating the NBDs and are lined with residues  
237 primarily along the BmrC half of the TM bundle. These pocket-lining residues differ  
238 between the two halves, ie they are in non-equivalent from BmrC to BmrD (**Fig. 4H-I**),  
239 likely because the TMD segment lining the substrate vestibule itself is asymmetric (**Fig**  
240 **4A; Supp. Fig. 5**). Nonetheless, BmrC residues L130, F134, and W290 line both pockets.  
241 Also, both pockets form a chemically similar environment, lined by aromatic residues  
242 (pocket 1 – Phe293; pocket 2 – Phe83 and Phe134) and capped by an acidic residue  
243 (pocket 1 Glu297; pocket 2 – Asp141).

### 244 **Antiparallel Hoechst molecules are stabilized by analogous interaction patterns**

245 To evaluate the interpretation of the distinct densities observed within the BmrCD  
246 transmembrane domain as two antiparallel Hoechst molecules, and to identify the specific  
247 interactions that underpin their stabilization, we turned to all-atom molecular dynamics  
248 (MD) simulations (**Fig. 4E**). Specifically, we calculated two independent 1- $\mu$ s trajectories  
249 in which the transporter and the two Hoechst molecules are free to diffuse, or reconfigure,  
250 and evaluated the resulting structure in each case. For computational efficiency, we  
251 considered a protein construct that lacks the nucleotide-binding domains and the ECD  
252 inserted between TM1 and TM2 of BmrD was also truncated (**Fig. 4E**). In the cryo-EM  
253 structure, these domains contribute minimally to the BmrC-BmrD interface, which  
254 primarily involves contacts in the transmembrane domains. The simulated construct  
255 showed a high degree of similarity to the starting structure throughout the calculated  
256 trajectories, with average backbone RMSD values of  $1.6 \pm 0.2$  Å over the last 0.5  $\mu$ s (**Fig.**  
257 **5F**). The two Hoechst molecules initially modeled also remained stably bound, each  
258 forming multiple contacts with BmrC, but barely any with BmrD (**Figs. 4G,4H,4I Supp.**

259 **Fig. 6).** For both molecules, the two simulations resulted in similar poses and interaction  
260 patterns; this convergence is reassuring as it indicates both MD trajectories sample the  
261 same energetically favorable states. The information from the MD trajectories was used  
262 to fit the Hoechst molecules in cryo-EM density for an optimal placement.

263 Unlike the two molecules of ATP in the BmrCD NBSs, the two molecules of  
264 Hoechst are marked by different geometries (**Fig. 4C**). Hoecsht-1 (silver) is largely  
265 coordinated by residues from BmrC TM3, TM5 and TM6 and one residue from BmrD TM1  
266 and 2 residues from BmrD TM6 (**Fig. 4H**) whereas Hoecsht-2 (green) forms extensive  
267 contacts with residues primarily from BmrC TM1, TM2, and TM3 (**Fig. 4I**). The binding  
268 pose for Hoechst-1 appears to be defined by the interaction between the piperazine group  
269 (carrying a charge of +1) and Glu297 (**Fig. 4G**). The two benzimidazole rings (which  
270 together also carry a charge of +1) form additional  $\pi$ - $\pi$  and cation- $\pi$  interactions with the  
271 rings of Phe293 and Trp290, whereas the etoxy-benzene is engaged by a T-shaped  
272 aromatic interaction with Tyr257. Hoechst-2, while oriented inversely relative to the  
273 membrane plane, is similarly anchored by ion-pairing and cation- $\pi$  interactions formed by  
274 the piperazine group, namely with Asp141, Phe145 and Trp290, which is the only residue  
275 that contacts both ligand molecules in our trajectories. The benzimidazole rings in  
276 molecule '2' form additional  $\pi$ - $\pi$  and cation- $\pi$  interactions with the rings of Phe83 and  
277 Phe134, whereas the etoxy-benzene tail appears to be largely disengaged, in contrast to  
278 Hoechst-1 (**Fig. 4G**). These interactions,  $\pi$ - $\pi$  and cation- $\pi$  interactions, are reinforced by  
279 their observation in the cryo-EM structure. Interestingly, therefore, the pattern of  
280 interactions formed by the two molecules in this antiparallel arrangement also appears to  
281 reflect the internal structural symmetry of the TMDs.

282 Lastly, it is worth noting that these interaction patterns recapitulate what is  
283 observed in high-resolution crystal structures of other biomolecules in complex with  
284 Hoechst. In the outward-open structure of the MFS-family multi-drug transporter  
285 LmrP<sup>30</sup>, a Hoechst molecule is stabilized through ion-pairs between two acidic side chains  
286 and the piperazine and benzimidazole groups, albeit in a different orientation nearly  
287 perpendicular to the plane of the transmembrane. The ligand is however only in contact  
288 with one of the transmembrane domains, like in our structure of inward-open BmrCD.  
289 Binding of Hoechst to LmrR, a transcriptional repressor of the LmrCD drug transporter,  
290 involves aromatic stacking of tryptophan sidechains and the benzimidazole rings<sup>31</sup>, while  
291 dipole- $\pi$  and water-mediated polar interactions explain the mode of binding to DNA<sup>32</sup>. Our  
292 cryo-EM and MD simulation data shows that it is this interaction versatility that may enable  
293 BmrCD to recognize two Hoechst molecules simultaneously.

294 Moreover, the arrangement and asymmetry in geometry of the two Hoechst  
295 molecules in the cryo-EM structure and MD analysis are not without precedent and are  
296 reminiscent of the two molecules of the inhibitor zosuquidar bound to human Pgp<sup>13</sup>  
297 (ABCB1) where one zosuquidar molecule is extended while the other molecule is in a  
298 slightly bent conformation (**Supp. Fig. 5**). Notably, binding of these inhibitors occurs at a  
299 site closer to the extracellular gate, which potentially supports the occluded architecture  
300 observed in Pgp. The positioning of Hoechst in BmrCD-QQ is most similar to LPS bound  
301 to MsbA and overlaps with the inner core of the polysaccharide portion of the molecule  
302 (**Supp. Fig. 5**)<sup>20</sup>, parallel with the presumed inner leaflet of the transmembrane region.

303

304 **Cooperative Hoechst stimulation of ATP turnover is blunted by mutation of**  
305 **coordination residues**

306 Because our structure reveals the presence of two bound Hoechst molecules, we  
307 reasoned that mutual stabilization would result in cooperative binding of the drug. To test  
308 this notion, we determined the  $k_{cat}$  of BmrCD ATP hydrolysis as a function of increasing  
309 Hoechst concentrations (**Fig. 5A**). We observed a sigmoidal dependence of  $k_{cat}$  with a  
310 Hill coefficient of approximately 1.8 (**Fig. 5B**). Not only does this data confirm  
311 cooperativity, but it also mechanistically validates the binding of two Hoechst molecules  
312 by demonstrating direct coupling to ATP hydrolysis to the NBDs.

313 Conversely, mutations of residues that coordinate the substrate molecules in the  
314 structure reduce stimulation of ATP turnover (**Fig. 5C**). We targeted both acidic and  
315 hydrophobic residues in the cavity. Alanine substitution effects were variable but overall  
316 consistent with the residues implicated in the structure. Notably, W290A which  
317 coordinates both Hoechst molecules has a substantial effect on ATP stimulation.  
318 Similarly, D141 in proximity to Hoechst-2 abrogates the Hoechst dependence, although  
319 its basal rate is higher than for WT BmrCD. This presumably reflects a rearrangement of  
320 the BmrC molecules that disrupt coupling of the TMD to the NBD.

321 **DISCUSSION**

322 The accelerated pace of structure determination of ABC exporters set the stage  
323 for an almost unprecedented structure-mechanism understanding. Yet intermediates  
324 predicted to be populated in the transport cycle continue to be conspicuously absent from  
325 the structural record. In addition, except for TmrAB and bacterial homodimers, the  
326 structure space has been dominated by transporters with impaired ATP-hydrolysis. In the  
327 presence of ATP, these structures are outward-facing with no evidence of bound  
328 substrates. Based on spectroscopic<sup>14,33</sup> and biochemical data<sup>34</sup>, the underlying mutations  
329 conspire to reshape the energy landscape further confounding the mechanistic  
330 interpretation of the structural record.

331  
332 The collection of TmrAB cryo-EM structures is thus far the most complete record  
333 of stable intermediates on the energy landscape of an ABC exporter. However, under  
334 turnover conditions of excess ATP, two predicted intermediates were missing. One is the  
335 OF conformation which purportedly release the substrate, the absence of which was  
336 attributed to its presumed transient nature. The structure of the OF conformation was  
337 visualized in the catalytically-impaired mutant bound to ATP as well as in the vanadate-  
338 trapped WT. The second, is a loaded pre-transport intermediate poised for transition to  
339 the high energy OF conformation. Because previous structures of catalytically-impaired  
340 ABC exporters such as Pgp<sup>3</sup> and Mrp1<sup>4</sup> were in the OF conformations, a substrate- and  
341 ATP-loaded IF intermediate was not accounted for.

342  
343 Here, we report the structure of this elusive substrate- and ATP-bound,  
344 intermediate. Cryo-EM reveals an IF architecture bound with to molecules of the substrate  
345 Hoechst-33342 in the TMD, and two molecules of ATP in the NBDs of a catalytically  
346 impaired variant of BmrCD. Each molecule of Hoechst binds in a similarly located but  
347 nonequivalent pocket on the C or D chain and our ATPase data support their role in  
348 cooperative allosteric modulation of ATP turnover. Validated by DEER measurements in



349 the WT and the mutant, we assign this conformation to the substrate- and ATP-loaded  
350 intermediate poised for transition to a high energy post hydrolysis intermediate. In the  
351 case presented here, previous DEER data highlighted the stability of the ATP-bound IF  
352 intermediate in BmrCD which was one of two fortuitous factors that allowed it to be  
353 represented in our cryo-EM reconstruction, although outward facing states may also be  
354 present. The second factor is the structural order of this intermediate which was  
355 conducive to its cryo-EM reconstruction.

356  
357 Our BmrCD structure unlocks details of the nature of pseudosymmetry breaking  
358 in ABC transporters and stimulates hypotheses on the mechanistic roles of symmetry  
359 mismatch between the NBDs and TMDs. Alignment with the recently determined cryo-  
360 EM structures of TmrAB confirms that BmrCD is in a previously unobserved intermediate.  
361 Distances between NBDs are most consistent with the inward-facing wide state, albeit  
362 BmrCD is wider than TmrAB. Approximately 75% of BmrCD aligns with this TmrAB  
363 conformation, including all of BmrC and most of the transmembrane portion of BmrD. The  
364 NBD of the canonical BmrD protomer does not align, instead showing a  $\sim 40^\circ$  rotation  
365 around the symmetry axis of the NBD dimer.

366 The symmetry of the NBDs holds for most of the transmembrane region but is  
367 broken in several locations including TM3 and TM6, especially TM6 in BmrD. TM6 is  
368 noteworthy because this helix has been identified as important for substrate gatekeeping  
369 in TmrAB<sup>35</sup> and in *C. elegans* Pgp<sup>36</sup>. In our structure, TM6 in BmrC and BmrD each  
370 directly binds one of the two Hoechst molecules which are located in similar pockets in  
371 BmrC and BmrD, showing a pseudo-symmetric arrangement. However, TM6 from BmrC  
372 breaks that symmetry and is closer to TM6 of BmrD. MD simulations confirm this  
373 arrangement and the stabilizing interactions that overlap with the binding mode observed  
374 in the structure. We propose a direct relationship between the asymmetry of substrate  
375 binding in the cavity and the overall asymmetry of the TMDs of BmrCD.

376  
377 An emerging theme from structural and spectroscopic investigations of ABC  
378 exporters posits a role for substrates and inhibitors in stabilizing symmetric or asymmetric  
379 conformations. Cryo-EM structures of Pgp have highlighted different modes of inhibitors  
380 and substrates binding with the former filling more of the substrate cavity and inducing a  
381 more symmetric arrangement of the NBDs<sup>12</sup>. However, substrate binding induces  
382 asymmetric states both in IF conformations and post-hydrolysis conformations, as  
383 deduced from DEER analysis of Pgp<sup>37</sup>. Building on this theme, we propose that our  
384 symmetry-mismatched BmrCD structure is arrested in an “inhibited-like conformation” by  
385 the substitution of the catalytic glutamate in the consensus NBS. In a WT background,  
386 we propose that the asymmetry would propagate from the TMD to the NBD resulting in  
387 the asymmetric hydrolysis of ATP during transport. Indeed, extensive DEER  
388 investigations of BmrCD under turnover conditions concluded that ATP hydrolysis in the  
389 consensus NBS is coupled to asymmetric structure of the NBDs<sup>14</sup>. We predict that  
390 subsequent or concurrent transition to an OF conformation accompanied by the  
391 dissociation of the substrates resolves the asymmetry in the TMD.

392

393 In addition to outlining the structural features and the mechanistic context of an  
394 intermediate presumed to be poised for transport and revealing modes of substrate  
395 interactions with a multidrug transporter, our results have general implications for the field.  
396 Our structure resembles a necessary intermediate on the path from structures that have  
397 been observed with cryo-EM – a symmetric resting state without substrate loaded to  
398 asymmetric post-hydrolysis states that have released substrate. In between these states,  
399 a transition must occur that “breaks” this symmetry and bring NBDs into alignment for  
400 proper catalysis to take place in one of the two NBDs. This transition may reflect  
401 asymmetric loading of substrate and asymmetric movements in the TMDs that  
402 allosterically facilitate NBD alignment. BmrCD only has one such functional site, but a  
403 similar mechanism may be relevant for most ABC exporters, which have two such sites  
404 but which nevertheless might have a preferred order<sup>38</sup>. Nevertheless, the absence of  
405 intermediates in the structural record of a particular transporter may reflect the energetic  
406 idiosyncrasies of the transporter being investigated and should not be extrapolated in the  
407 context of a general mechanism. Thus, a consensus mechanism for ABC heterodimers  
408 will require the convergence of structural, spectroscopic and functional investigations of  
409 multiple transporters.

410

## 411 **MATERIALS AND METHODS**

### 412 **Cloning**

413 Cysteine-less (C-less) BmrCD in pET21b(+) was created as described  
414 previously<sup>14</sup>. Briefly, native Cysteines in BmrCD-WT were substituted with alanines using  
415 QuikChange site directed mutagenesis. The C-less BmrCD template was then used to  
416 generate BmrCD-QQ where the conserved Glutamate of the walker B motif in the  
417 consensus site in BmrD (E592) and aspartate of the degenerate site in BmrC (D500) were  
418 substituted with Glutamine (Q). Site-directed mutagenesis was also used to generate  
419 double-Cysteine mutants and substrate binding mutants. All substitutions were confirmed  
420 by DNA sequencing.

421

### 422 **Expression and purification**

423 Wild-type C-less BmrCD and all mutant plasmids were transformed into  
424 *Escherichia coli* BL21(DE3) cells. A single colony was inoculated into 20 mL Luria Broth  
425 (LB) for the primary culture which subsequently was used to start the main culture  
426 consisting of 1L of minimal media supplemented with glycerol (0.5% v/v), thiamin (2.5  
427 µg/mL), ampicillin (100 µg/mL), MgSO<sub>4</sub> (1 mM), and 50X MEM amino acids (1 mL).  
428 Cultures were grown at 37°C with shaking to an OD<sub>600</sub> of 1.2, and the expression of  
429 BmrCD induced by the addition of 0.7 mM isopropyl β-D-1-thiogalactopyranoside. BmrCD  
430 cultures were incubated at 25°C with shaking for another 5.5 h. The cells were harvested  
431 by centrifugation and stored at -80°C. The cell pellets were resuspended in 20 mL of lysis  
432 buffer (50 mM Tris-HCl, 5 mM MgCl<sub>2</sub>, 1mM EDTA, pH 7.5), including 10 mM DTT, 10  
433 µg/mL DNase, 0.1 mM PMSF, 1/3 of a Complete EDTA-free protease inhibitor cocktail  
434 tablet (Roche) and were lysed by five passes through an Avestin C3 homogenizer at 15-  
435 20,000 PSI. The lysate was centrifuged at 9,000g for 10 min to remove cell debris and  
436 the membranes isolated by ultracentrifugation at ~200,000g for 1 h.

437 Membranes of C-less BmrCD and mutants assayed in 0.05% n-dodecyl- $\beta$ -D-  
438 maltopyranoside ( $\beta$ -DDM) were solubilized in resuspension buffer (50 mM Tris-HCl, 100  
439 mM NaCl, 15% (v/v) glycerol, pH 8.0) including 1 mM DTT, 1.25 % w/v  $\beta$ -DDM with  
440 constant stirring on ice for 1 h. The membranes of double mutants studied in 0.25%  
441 digitonin were solubilized in resuspension buffer (50 mM Tris-HCl, 100 mM NaCl, 15%  
442 (v/v) glycerol, pH 8.0) including 1 mM DTT and 1% w/v Lauryl Maltose Neopentyl Glycol  
443 (LMNG). Solubilized membranes were then centrifuged at 200,000g for 1 h to remove  
444 insoluble particulates. The solubilized fraction was then incubated for 2 h with 300  $\mu$ L of  
445 pre-equilibrated Ni-NTA resin (QIAGEN) in Ni-NTA buffer (50 mM Tris-HCl, 100 mM NaCl,  
446 15% (v/v) glycerol, 0.05%  $\beta$ -DDM, pH 8.0) for  $\beta$ -DDM samples or Ni-NTA buffer 2 (50 mM  
447 Tris-HCl, 100 mM NaCl, 15% (v/v) glycerol, 0.005% LMNG, pH 8.0) for digitonin samples.  
448 BmrCD-bound Ni-NTA resin was loaded into a gravity column, washed with five column  
449 volumes of Ni-NTA buffer containing 20 mM imidazole and eluted with buffer containing  
450 250 mM imidazole.

451

### 452 **Cryo-EM sample preparation**

453 C-less BmrCD harboring the D500Q (BmrC) and D592Q (BmrD) mutations  
454 (BmrCD-QQ) was prepared cryo-EM by first exchanging sample purified by size exclusion  
455 chromatography in SEC Buffer 1 (50 mM Tris-HCl, 150 mM NaCl, 0.01% LMNG, 20%  
456 glycerol, pH 7.4) into SEC Buffer 2 (50 mM Tris-HCl, 200 mM NaCl, 0.06% digitonin, pH  
457 7.4). Briefly, approximately 2.5 mg of SEC-purified BmrCD-QQ was buffer exchanged by  
458 two rounds of 10-fold dilution with SEC Buffer 2 and concentration in an Amicon Ultra-  
459 100 kDa centrifugal filters (Millipore) prior to SEC purification over a Superose 6 Increase  
460 column (Cytiva) equilibrated in SEC Buffer 2 (**Supp. Fig. 1**). Fractions were pooled and  
461 concentrated to a final concentration of 3.1 mg/mL measured by BCA Assay (Pierce). For  
462 substrate trapping, protein was diluted to 22  $\mu$ M (~2.5 mg/mL) in 50 mM Tris-HCl, 200  
463 mM NaCl, 0.2% digitonin, pH 7.4 and incubated with 75  $\mu$ M Hoechst-33342 (Thermo  
464 Fisher) on ice for 30 min prior to the addition of 8 mM ATP/MgCl<sub>2</sub>. To initiate substrate  
465 trapping, the sample was then heated for 1 min at 37°C and immediately applied to freshly  
466 glow-discharged grids placed inside of a Leica GP2 plunge freezer equilibrated to 10°C  
467 and 85% humidity.

468

### 469 **Cryo-EM data acquisition and processing**

470 Cryo-EM data were collected on a Quantifoil 1.2/1.3 200-mesh spacing copper grid  
471 (Electron Microscopy Sciences) loaded with 5  $\mu$ L of BmrCD-QQ saturated with Hoechst-  
472 33342/ATP/MgCl<sub>2</sub> (BmrCD-QQ<sup>H/ATP</sup>) and incubated for 10 s prior to blotting on Whatman  
473 1 paper for 4 s and plunge-frozen in liquid ethane. In total, 6,919 were recorded by beam-  
474 image shift on a 300 kV Titan Krios microscope (Thermo Fisher) equipped with a K3  
475 Summit detector (Gatan) operated in super-resolution mode (Pacific Northwest Center  
476 for Cryo-EM) at a nominal magnification of 81,000X, corresponding to a pixel size of 0.54  
477 Å. Dose-fractionated movies were acquired at an electron flux of 0.82 e<sup>-1</sup>/Å<sup>2</sup> per frame  
478 (45 frames total) corresponding to a total dose of 37.2 e<sup>-1</sup>/Å<sup>2</sup>. Images were recorded with  
479 a target defocus range of -0.8 to 2.1  $\mu$ m.

480 Data were processed in RELION 3.0<sup>39</sup> and 3.1<sup>40</sup>. Frame-based motion correction,  
481 2X binning, and dose weighting were performed using MotionCor2 to generate an image  
482 stack with pixel size of 1.059 Å. Defocus values were estimated from motion corrected,  
483 dose weighted images using CTFIND4.1<sup>41</sup>. Approximately 1,500 particles were  
484 manually picked from an initial subset of micrographs and subject to likelihood-based 2D  
485 classification to generate templates for automated particle picking. In total, 4,970,928  
486 particles were picked, extracted at a box size of 288 pixels with 4.0 Å/pixel, split into 4  
487 subsets of 1,242,732 particles, and subject to four rounds of 2D classification and particle  
488 selection to eliminate bad particles resulting in a final particle set containing 632,978  
489 particles extracted to the full pixel size (1.059 Å/pix) for 3D classification. The best class  
490 selected on the basis of highest resolution and visible transmembrane density yielded  
491 157,021 particles, which were then subject to iterative rounds of 3D refinement, CTF  
492 refinement, Bayesian polishing, and postprocessing in RELION to yield a final map at 3.5  
493 Å resolution as defined by local resolution calculation in RELION 3.1. Masks were  
494 generated manually in Chimera<sup>42</sup> from RELION and CistEM<sup>43</sup> maps. The use of  
495 SIDESPLITTER<sup>44</sup> extensions in RELION 3.1 were used in the reconstruction step in later  
496 rounds of refinement with a large mask to counter the effects of observed over-fitting to  
497 the detergent micelle and to ensure that all map density was included. Data processing  
498 details are shown in **Supplemental Figure 1**.

499 Model building was performed was performed in Coot<sup>46</sup> using RELION  
500 postprocessed maps with blurring and sharpening as needed performed in CCPEM<sup>45</sup>. A  
501 starting structure was generated from TmrAB (PDBID: 6rag<sup>35</sup>) truncated to poly-alanine.  
502 Real space refinement was performed using Phenix<sup>47</sup> against RELION postprocessed  
503 maps. Secondary structure and reference model restraints were used, as was a high  
504 nonbonded energy term to ensure proper geometry. The ISOLDE<sup>48</sup> plug-in to ChimeraX<sup>49</sup>  
505 was used for difficult regions and to ensure correct orientation of H-bonds. Placement of  
506 the Hoechst molecules was performed manually in Coot and then further refined with MD  
507 simulations (see below) and in Phenix. All structure figures were made using ChimeraX  
508 and PyMol<sup>50</sup>.

509

## 510 MD simulations

511 All simulations were carried out with NAMD 2.12<sup>51</sup> using the CHARMM36 force  
512 field<sup>52,53</sup> periodic boundary conditions, constant temperature (298 K) and semi-isotropic  
513 pressure (1 atm), and an integration time step of 2 fs. Force-field parameters for Hoechst-  
514 33342 were those developed in a previous study<sup>30</sup>. Long-range electrostatic interactions  
515 were calculated using PME, with a real-space cut-off of 12 Å; van der Waals interactions  
516 were computed with a Lennard-Jones potential cut-off at 12 Å with a smooth switching  
517 function taking effect at 10 Å. For computational efficiency, the considered in the  
518 simulations comprises only the transmembrane domain, i.e. extracellular (BmrD, residue  
519 50-114) and intracellular domains (BmrC, residue 317-574; BmrD, residue 411-665) were  
520 truncated. Two molecules of the ligand Hoechst-33342 were included; the initial binding  
521 pose was produced by manual-fitting into the cryo-EM density map. The protein-ligand  
522 complex was embedded in a pre-equilibrated palmitoyl-oleoyl-phosphatidyl-choline  
523 bilayer, in a 100 mM NaCl buffer, using GRIFFIN<sup>51</sup>. Counterions were added to neutralize  
524 the net charge of the protein-ligand complex. The resulting system contain 206 POPC

525 lipids and are  $\sim 90 \times 90 \times 126 \text{ \AA}$  in size, totaling  $\sim 106,000$  atoms. The molecular system  
526 was equilibrated following a staged protocol comprising a series of restrained simulations.  
527 The protocol consists of both positional and conformational restraints, gradually  
528 weakened over 100 ns, and individually applied to protein sidechains and backbone as  
529 well as the Hoechst molecules. Subsequently, two trajectories of 1  $\mu\text{s}$  each were  
530 calculated, with no restraints.

531  
532

### Spin-labeling of BmrCD

533 For EPR spectroscopy, double-Cysteine mutants generated on the C-less  
534 background of BmrCD were eluted following Ni-NTA purification and labeled with 20-fold  
535 molar excess of 1-oxyl-2,2,5,5-tetramethylpyrroline-3-methyl methanethiosulfonate  
536 (Enzo Life Sciences) at room temperature in the dark over a 4 h period, after which protein  
537 samples were placed at 4 °C overnight ( $\sim 15$  h). The labeled protein samples in  $\beta$ -DDM  
538 and LMNG were then separated from free label by size-exclusion chromatography on a  
539 Superdex 200 Increase column (Cytiva) in buffer containing 50 mM Tris-HCl, 150 mM  
540 NaCl, 10% (v/v) glycerol, pH 7.4 containing 0.05%  $\beta$ -DDM ( $\beta$ -DDM samples) or 0.01%  
541 LMNG (digitonin samples). The samples in 0.01% LMNG containing buffer were then  
542 exchanged into digitonin buffer (50 mM Tris-HCl, 200 mM NaCl, 0.06% w/v digitonin, pH  
543 7.4). The collected fractions of spin-labeled BmrCD mutants were concentrated using an  
544 Amicon Ultra-100 kDa centrifugal filters (Millipore), and the final concentration determined  
545 by absorbance at 280 nm (Mean extinction coefficient =  $68077.5 \text{ M}^{-1} \text{ cm}^{-1}$ ).

546  
547

### DEER sample preparation and DEER spectroscopy

548 Spin-labeled BmrCD mutants were concentrated to 70-100  $\mu\text{M}$  using Amicon Ultra-  
549 100 kDa centrifugal filters (Millipore) and incubated with nucleotides or Hoechst-33342.  
550 The final concentrations of ATP, AMP-PNP, vanadate,  $\text{MgCl}_2^+$ , and digitonin were 10 mM,  
551 10 mM, 5 mM, 10 mM, and 0.25% respectively. Samples for DEER analysis were  
552 cryoprotected with 24% (v/v) glycerol. Post-hydrolysis (ADP-Vi) and turnover (H-ATP-  
553  $\text{MgCl}_2^+$ ) samples prepared in digitonin buffer were incubated at 37°C for 15 min and 1 min,  
554 respectively.  $\beta$ -DDM-solubilized protein samples were trapped in the post-hydrolysis state  
555 and with AMP-PNP by incubating at 30°C for 30 min. Turnover samples in  $\beta$ -DDM buffer  
556 conditions were incubated at 30 °C for 5min. Post-hydrolysis (ADP-Vi), turnover (H-ATP-  
557  $\text{MgCl}_2^+$ ) and AMP-PNP reactions were stopped by flash freezing in a liquid nitrogen bath.

558 DEER spectroscopy was performed on an Elexsys E580 EPR spectrometer  
559 operating at Q-band frequency (33.9 GHz) equipped with a 40W Amp-Q amplifier (Bruker)  
560 with the dead-time free four-pulse sequence at 83 K<sup>54,55</sup>. The pulse lengths were 10 ns  
561 ( $p/2$ ) and 20 ns ( $p$ ) for the probe pulses and 40 ns for the pump pulse. The frequency  
562 separation was 73 MHz. Raw DEER decays were analyzed as described previously<sup>14</sup>.  
563 Briefly, primary DEER decays were analyzed using home-written software operating in  
564 the Matlab environment. The software carries out global analysis of the DEER decays  
565 obtained under different conditions for the same spin-labeled position. The distance  
566 distribution is assumed to consist of a sum of Gaussians, the number and population of  
567 which are determined based on a statistical criterion. Distance distributions on the  
568 BmrCD-QQ cryo-EM structure were predicted *in silico* using 1 ns molecular-dynamics  
569 simulations with dummy spin labels with default parameters using the DEER Spin-Pair

570 Distributor at the CHARMM-GUI website<sup>56,57</sup>. Experimental Data related to **Figures 1E,**  
571 **2D,** and **3D** are reported in **Supplemental Figure 7.**

572

### 573 **ATPase assays**

574 The specific ATPase activities for wild-type (WT) and mutants of C-less BmrCD  
575 were determined by an inorganic phosphate assay as previously described<sup>14</sup> with slight  
576 modification. Briefly, BmrCD (20 µg) samples were incubated with increasing  
577 concentrations of ATP at 30°C for 30 min under basal conditions (no Hoechst) or  
578 presence of different concentrations of Hoechst. The reaction was stopped by adding 1%  
579 SDS and the color was developed using a 1:1 solution of ammonium molybdate (2% in  
580 1M HCl) and ascorbic acid (12% in 1M HCl). The absorbance of samples was measured  
581 at a wavelength of 850 nm on a BioTek Synergy H4 microplate reader. The amount of  
582 phosphate released was determined by comparison to a standard curve generated from  
583 inorganic phosphate. The  $V_{max}$  of WT and mutant C-less BmrCD was derived using the  
584 Levenberg-Marquart nonlinear least squares fitting approach in Origin (OriginLab, Inc).

585

### 586 **ACKNOWLEDGEMENTS**

587 We thank Theo Humphries and other support staff at the Pacific Northwest Center  
588 for Cryo-EM (PNCC) for assistance with cryo-EM data collection. We thank members of  
589 the Tomasiak lab and Derek Claxton from the Mchaourab lab for critical reading of this  
590 manuscript. This research was funded by the Division of Intramural Research of the  
591 National Heart, Lung and Blood Institute (WZ and JDFG), National Institutes of Health  
592 (NIH), USA and grants from the National Institute of General Medicine Sciences to T.M.  
593 Tomasiak (R00 GM114245) and H.S. Mchaourab (GM 128087). Computational  
594 resources were in part provided by the NIH HPC facility Biowulf.

595

## REFERENCES AND NOTES

- 596 1. Holland, I. B. Rise and rise of the ABC transporter families. *Res. Microbiol.* **170**,  
597 304–320 (2019).
- 598 2. Hofmann, S. *et al.* Conformation space of a heterodimeric ABC exporter under  
599 turnover conditions. *Nature* **571**, 580–583 (2019).
- 600 3. Kim, Y. & Chen, J. Molecular structure of human P-glycoprotein in the ATP-  
601 bound, outward-facing conformation. *Science (80-. )*. **359**, 915–919 (2018).
- 602 4. Johnson, Z. L. & Chen, J. ATP Binding Enables Substrate Release from Multidrug  
603 Resistance Protein 1. *Cell* **172**, 81–89.e10 (2018).
- 604 5. Johnson, Z. L. & Chen, J. Structural Basis of Substrate Recognition by the  
605 Multidrug Resistance Protein MRP1. *Cell* **168**, 1075–1085.e9 (2017).
- 606 6. Choudhury, H. G. *et al.* Structure of an antibacterial peptide ATP-binding cassette  
607 transporter in a novel outward occluded state. *Proc. Natl. Acad. Sci. U. S. A.* **111**,  
608 9145–9150 (2014).
- 609 7. Ward, A., Reyes, C. L., Yu, J., Roth, C. B. & Chang, G. Flexibility in the ABC  
610 transporter MsbA: Alternating access with a twist. *Proc. Natl. Acad. Sci. U. S. A.*  
611 **104**, 19005–19010 (2007).
- 612 8. Dawson, R. J. P. & Locher, K. P. Structure of a bacterial multidrug ABC  
613 transporter. *Nature* **443**, 180–185 (2006).
- 614 9. Mishra, S. *et al.* Conformational dynamics of the nucleotide binding domains and  
615 the power stroke of a heterodimeric ABC transporter. *Elife* **3**, e02740 (2014).
- 616 10. Tamaki, A., Ierano, C., Szakacs, G., Robey, R. W. & Bates, S. E. The  
617 controversial role of ABC transporters in clinical oncology. *Essays Biochem.* **50**,  
618 209–232 (2011).
- 619 11. Seelig, A. P-Glycoprotein: One Mechanism, Many Tasks and the Consequences  
620 for Pharmacotherapy of Cancers. *Frontiers in Oncology* **10**, (2020).
- 621 12. Alam, A., Kowal, J., Broude, E., Roninson, I. & Locher, K. P. Structural insight into  
622 substrate and inhibitor discrimination by human P-glycoprotein. *Science (80-. )*.  
623 **363**, 753–756 (2019).
- 624 13. Nosol, K. *et al.* Cryo-EM structures reveal distinct mechanisms of inhibition of the  
625 human multidrug transporter ABCB1. *Proc. Natl. Acad. Sci. U. S. A.* **117**, 26245–  
626 26253 (2020).
- 627 14. Mishra, S. *et al.* Conformational dynamics of the nucleotide binding domains and  
628 the power stroke of a heterodimeric ABC transporter. *Elife* **2014**, (2014).
- 629 15. Collauto, A., Mishra, S., Litvinov, A., Mchaourab, H. S. & Goldfarb, D. Direct  
630 Spectroscopic Detection of ATP Turnover Reveals Mechanistic Divergence of  
631 ABC Exporters Article Direct Spectroscopic Detection of ATP Turnover Reveals  
632 Mechanistic Divergence of ABC Exporters. *Structure* **25**, (2017).
- 633 16. Torres, C., Galián, C., Freiberg, C., Fantino, J.-R. & Jault, J.-M. The YheI/YheH  
634 heterodimer from *Bacillus subtilis* is a multidrug ABC transporter. *Biochim.*  
635 *Biophys. Acta - Biomembr.* **1788**, 615–622 (2009).
- 636 17. Zutz, A. *et al.* Asymmetric ATP Hydrolysis Cycle of the Heterodimeric Multidrug  
637 ABC Transport Complex TmrAB from *Thermus thermophilus*. *J. Biol. Chem.* **286**,  
638 7104–7115 (2011).
- 639 18. Nöll, A. *et al.* Crystal structure and mechanistic basis of a functional homolog of  
640 the antigen transporter TAP. *Proc. Natl. Acad. Sci. U. S. A.* **114**, E438–E447

- 641 (2017).
- 642 19. Mi, W. *et al.* Structural basis of MsbA-mediated lipopolysaccharide transport.
- 643 *Nature* **549**, 233–237 (2017).
- 644 20. Ho, H. *et al.* Structural basis for dual-mode inhibition of the ABC transporter
- 645 MsbA. *Nature* **557**, 196–201 (2018).
- 646 21. Angiulli, G. *et al.* New approach for membrane protein reconstitution into
- 647 peptidiscs and basis for their adaptability to different proteins. *Elife* **9**, (2020).
- 648 22. Hohl, M. *et al.* Structural basis for allosteric cross-talk between the asymmetric
- 649 nucleotide binding sites of a heterodimeric ABC exporter. *Proc. Natl. Acad. Sci. U.*
- 650 *S. A.* **111**, 11025–11030 (2014).
- 651 23. Ward, A., Reyes, C. L., Yu, J., Roth, C. B. & Chang, G. Flexibility in the ABC
- 652 transporter MsbA: Alternating access with a twist. *Proc. Natl. Acad. Sci. U. S. A.*
- 653 **104**, 19005–19010 (2007).
- 654 24. Dawson, R. J. P. & Locher, K. P. Structure of a bacterial multidrug ABC
- 655 transporter. *Nature* **443**, 180–185 (2006).
- 656 25. Esser, L. *et al.* Structures of the Multidrug Transporter P-glycoprotein Reveal
- 657 Asymmetric ATP Binding and the Mechanism of Polyspecificity. *J. Biol. Chem.*
- 658 **292**, 446–461 (2017).
- 659 26. Hohl, M. *et al.* Structural basis for allosteric cross-talk between the asymmetric
- 660 nucleotide binding sites of a heterodimeric ABC exporter. *Proc. Natl. Acad. Sci. U.*
- 661 *S. A.* **111**, 11025–11030 (2014).
- 662 27. Timachi, M. H. *et al.* Exploring conformational equilibria of a heterodimeric ABC
- 663 transporter. *Elife* **6**, (2017).
- 664 28. Nosol, K. *et al.* Cryo-EM structures reveal distinct mechanisms of inhibition of the
- 665 human multidrug transporter ABCB1. *Proc. Natl. Acad. Sci. U. S. A.* **117**, 26245–
- 666 26253 (2020).
- 667 29. Alam, A., Kowal, J., Broude, E., Roninson, I. & Locher, K. P. Structural insight into
- 668 substrate and inhibitor discrimination by human P-glycoprotein. *Science (80-. ).*
- 669 **363**, 753–756 (2019).
- 670 30. Debruycker, V. *et al.* An embedded lipid in the multidrug transporter LmrP
- 671 suggests a mechanism for polyspecificity. *Nat. Struct. Mol. Biol.* (2020).
- 672 doi:10.1038/s41594-020-0464-y
- 673 31. Madoori, P. K., Agustiandari, H., Driessen, A. J. M. & Thunnissen, A. M. W. H.
- 674 Structure of the transcriptional regulator LmrR and its mechanism of multidrug
- 675 recognition. *EMBO J.* **28**, 156–166 (2009).
- 676 32. Robinson, H. *et al.* 2'-Deoxyisoguanosine adopts more than one tautomer to form
- 677 base pairs with thymidine observed by high-resolution crystal structure analysis.
- 678 *Biochemistry* **37**, 10897–10905 (1998).
- 679 33. Verhalen, B. *et al.* Energy transduction and alternating access of the mammalian
- 680 ABC transporter P-glycoprotein. *Nature* **543**, 738–741 (2017).
- 681 34. Lusvarghi, S., Durell, S. R. & Ambudkar, S. V. Does the ATP-bound EQ mutant
- 682 reflect the pre- or post-ATP hydrolysis state in the catalytic cycle of human P-
- 683 glycoprotein (ABCB1)? *FEBS Lett.* (2021). doi:10.1002/1873-3468.14054
- 684 35. Hofmann, S. *et al.* Conformation space of a heterodimeric ABC exporter under
- 685 turnover conditions. *Nature* **571**, 580–583 (2019).
- 686 36. Jin, M. S., Oldham, M. L., Zhang, Q. & Chen, J. Crystal structure of the multidrug



- 687 transporter P-glycoprotein from *Caenorhabditis elegans*. *Nature* **490**, 566–569  
688 (2012).
- 689 37. Dastvan, R., Mishra, S., Peskova, Y. B., Nakamoto, R. K. & Mchaourab, H. S.  
690 Mechanism of allosteric modulation of P-glycoprotein by transport substrates and  
691 inhibitors. *Science (80-. )*. **364**, 689–692 (2019).
- 692 38. Siarheyeva, A., Liu, R. & Sharom, F. J. Characterization of an asymmetric  
693 occluded state of P-glycoprotein with two bound nucleotides: Implications for  
694 catalysis. *J. Biol. Chem.* **285**, 7575–7586 (2010).
- 695 39. Zivanov, J. *et al.* New tools for automated high-resolution cryo-EM structure  
696 determination in RELION-3. *Elife* **7**, (2018).
- 697 40. Zivanov, J., Nakane, T. & Scheres, S. H. W. Estimation of high-order aberrations  
698 and anisotropic magnification from cryo-EM data sets in RELION-3.1. *IUCrJ* **7**,  
699 253–267 (2020).
- 700 41. Rohou, A. & Grigorieff, N. CTFFIND4: Fast and accurate defocus estimation from  
701 electron micrographs. *J. Struct. Biol.* **192**, 216–221 (2015).
- 702 42. Pettersen, E. F. *et al.* UCSF Chimera - A visualization system for exploratory  
703 research and analysis. *J. Comput. Chem.* **25**, 1605–1612 (2004).
- 704 43. Grant, T., Rohou, A. & Grigorieff, N. cisTEM, user-friendly software for single-  
705 particle image processing. *Elife* **7**, (2018).
- 706 44. Ramlaul, K., Palmer, C. M., Nakane, T. & Aylett, C. H. S. Mitigating local over-  
707 fitting during single particle reconstruction with SIDESPLITTER. *J. Struct. Biol.*  
708 **211**, (2020).
- 709 45. Wood, C. *et al.* Collaborative computational project for electron cryo-microscopy.  
710 *Acta Crystallogr. Sect. D Biol. Crystallogr.* **71**, 123–126 (2015).
- 711 46. Emsley, P., Lohkamp, B., Scott, W. G. & Cowtan, K. Features and development of  
712 Coot. *Acta Crystallogr. Sect. D Biol. Crystallogr.* **66**, 486–501 (2010).
- 713 47. Liebschner, D. *et al.* Macromolecular structure determination using X-rays,  
714 neutrons and electrons: Recent developments in Phenix. *Acta Crystallogr. Sect. D*  
715 *Struct. Biol.* **75**, 861–877 (2019).
- 716 48. Croll, T. I. ISOLDE: A physically realistic environment for model building into low-  
717 resolution electron-density maps. *Acta Crystallogr. Sect. D Struct. Biol.* **74**, 519–  
718 530 (2018).
- 719 49. Pettersen, E. F. *et al.* UCSF ChimeraX: Structure visualization for researchers,  
720 educators, and developers. *Protein Sci.* **30**, 70–82 (2021).
- 721 50. The PyMOL Molecular Graphics System, Version 2.0 Schrödinger, LLC.
- 722 51. Staritzbichler, R., Anselmi, C., Forrest, L. R. & Faraldo-Gómez, J. D. GRIFFIN: A  
723 versatile methodology for optimization of protein-lipid interfaces for membrane  
724 protein simulations. *J. Chem. Theory Comput.* **7**, 1167–1176 (2011).
- 725 52. Best, R. B. *et al.* Optimization of the additive CHARMM all-atom protein force field  
726 targeting improved sampling of the backbone  $\phi$ ,  $\psi$  and side-chain  $\chi_1$  and  $\chi_2$   
727 Dihedral Angles. *J. Chem. Theory Comput.* **8**, 3257–3273 (2012).
- 728 53. Klauda, J. B. *et al.* Update of the CHARMM All-Atom Additive Force Field for  
729 Lipids: Validation on Six Lipid Types. *J. Phys. Chem. B* **114**, 7830–7843 (2010).
- 730 54. Jeschke, G. DEER Distance Measurements on Proteins. *Annu. Rev. Phys. Chem.*  
731 **63**, 419–446 (2012).
- 732 55. Jeschke, G. & Polyhach, Y. Distance measurements on spin-labelled

- 733 biomacromolecules by pulsed electron paramagnetic resonance. *Phys. Chem.*  
734 *Chem. Phys.* **9**, 1895–1910 (2007).
- 735 56. Jo, S., Kim, T., Iyer, V. G. & Im, W. CHARMM-GUI: A web-based graphical user  
736 interface for CHARMM. *J. Comput. Chem.* **29**, 1859–1865 (2008).
- 737 57. Qi, Y. *et al.* CHARMM-GUI DEER facilitator for spin-pair distance distribution  
738 calculations and preparation of restrained-ensemble molecular dynamics  
739 simulations. *J. Comput. Chem.* **41**, 415–420 (2020).
- 740

741  
742  
743

## TABLES

**Table 1. Data collection and refinement statistics**

| <b>Refinement</b>                |                         |             |
|----------------------------------|-------------------------|-------------|
| Lengths (Å)                      | 101.66, 151.44, 97.43   |             |
| Atoms                            | 19813 (Hydrogens: 9926) |             |
| Residues                         | Protein: 1236           |             |
| Water                            | 0                       |             |
| Resolution (Å)                   | 3.5                     |             |
| Resolution Estimates (Å)         | Masked                  | Unmasked    |
| d FSC model (0/0.143/0.5) (Å)    | 2.8/3.1/6.1             | 3.0/3.1/6.4 |
| <b>B-factors (Å<sup>2</sup>)</b> |                         |             |
| Iso/Aniso (#)                    | 9887/0                  |             |
| Protein (min/max/mean)           | 12.04/113.39/61.00      |             |
| <b>Bonds (RMSD)</b>              |                         |             |
| Length (Å) (# > 4σ)              | 0.007                   |             |
| Angles (°) (# > 4σ)              | 1.199                   |             |
| <b>Validation</b>                |                         |             |
| MolProbity score                 | 1.46                    |             |
| Clash score                      | 0.86                    |             |
| <b>Ramachandran plot (%)</b>     |                         |             |
| Outliers                         | 0                       |             |
| Allowed                          | 9.0                     |             |
| Favored                          | 90.02                   |             |
| Rotamer outliers (%)             | 1.54                    |             |
| <b>Model vs. Data</b>            |                         |             |
| CC (mask)                        | 0.69                    |             |
| CC (box)                         | 0.61                    |             |
| CC (peaks)                       | 0.51                    |             |
| CC (volume)                      | 0.65                    |             |

744

745  
746  
747  
748

## FIGURES

### Figure 1

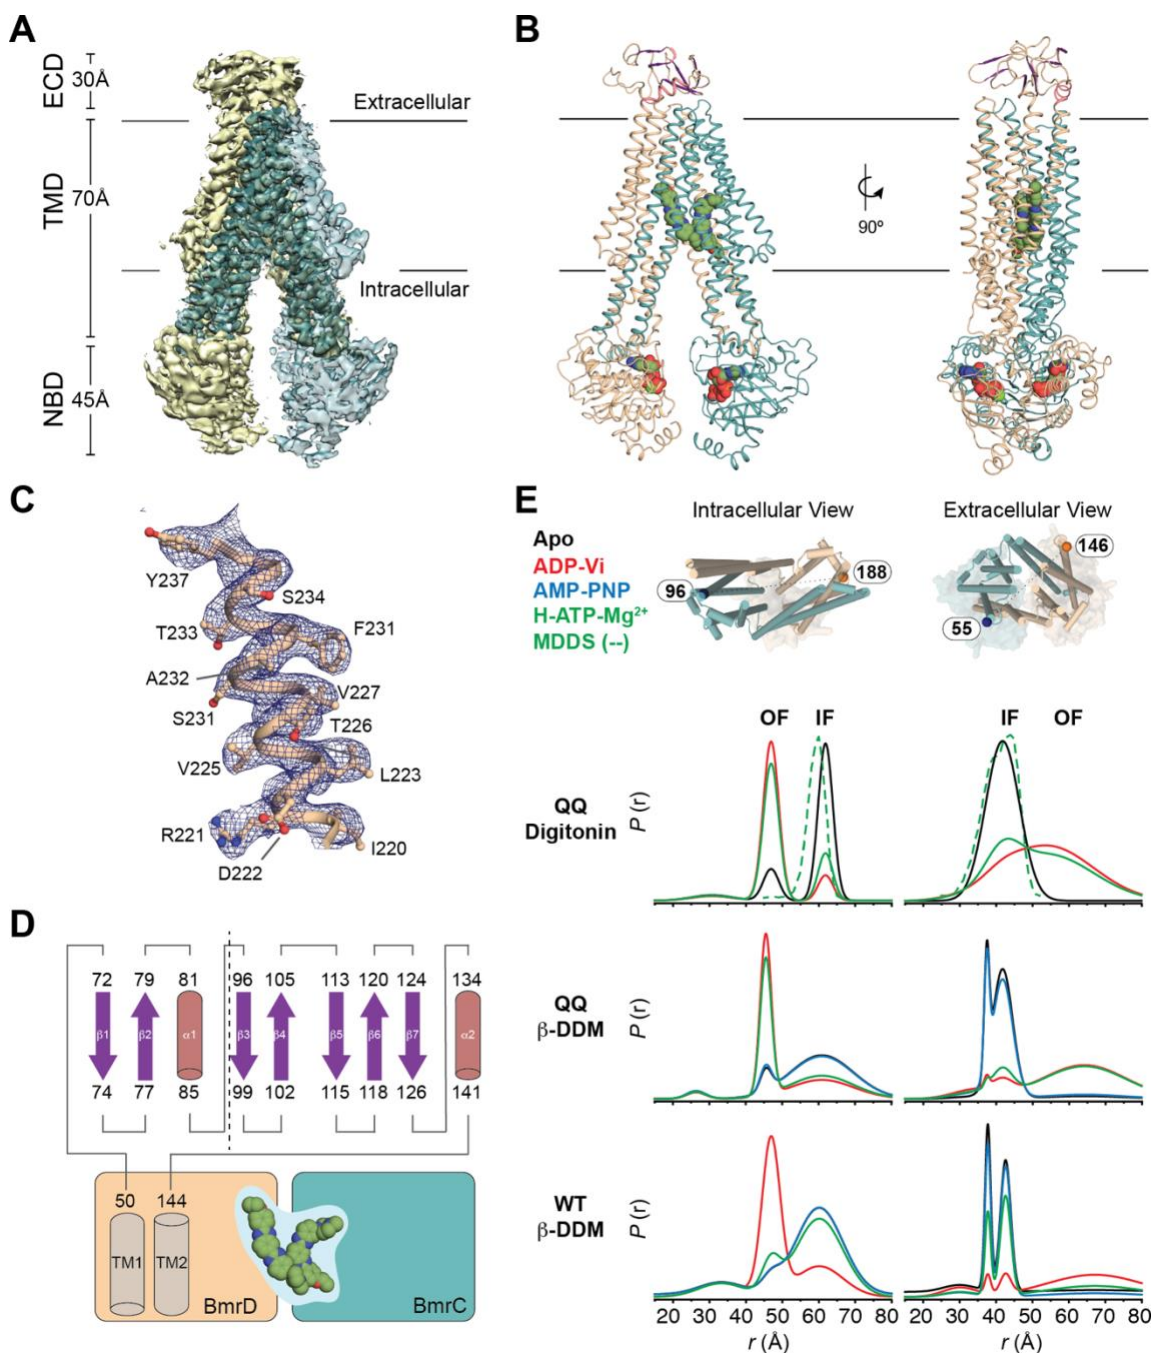

749

750 **Figure 1. Structure of BmrCD<sup>D500Q/E592Q</sup> in complex Hoechst-33342 and ATP. A)** Cryo-  
751 EM map and **B)** model of BmrCD<sup>D500Q/E592Q</sup> (BmrCD-QQ) bound to ATP and Hoechst-  
752 33342 (BmrCD-QQ<sup>H/ATP</sup>) highlighting the geometry and arrangement of the  
753 transmembrane domains (TMDs) and nucleotide binding domains (NBDs) relative to the  
754 extracellular domain insertion (ECD) and the membrane. **C)** Representative density of the

755 3.5Å resolution structure show in **(A)** and model corresponding to transmembrane helix  
756 3 from BmrD (TM3<sup>D</sup>). **D)** Topology of the ECD observed in BmrCD-QQ<sup>H/ATP</sup> relative to the  
757 TMD. **E)** DEER distance measurements for spin label pairs on the intracellular and  
758 extracellular regions of the TMD in the Cysteine-free background (WT\*) or the QQ mutant  
759 of BmrCD and in the presence of different substrates. The MDDS-derived distance  
760 distributions calculated for the cryo-EM model in **(B)** is overlaid with the DEER derived  
761 distance distributions.

762

## Figure 2

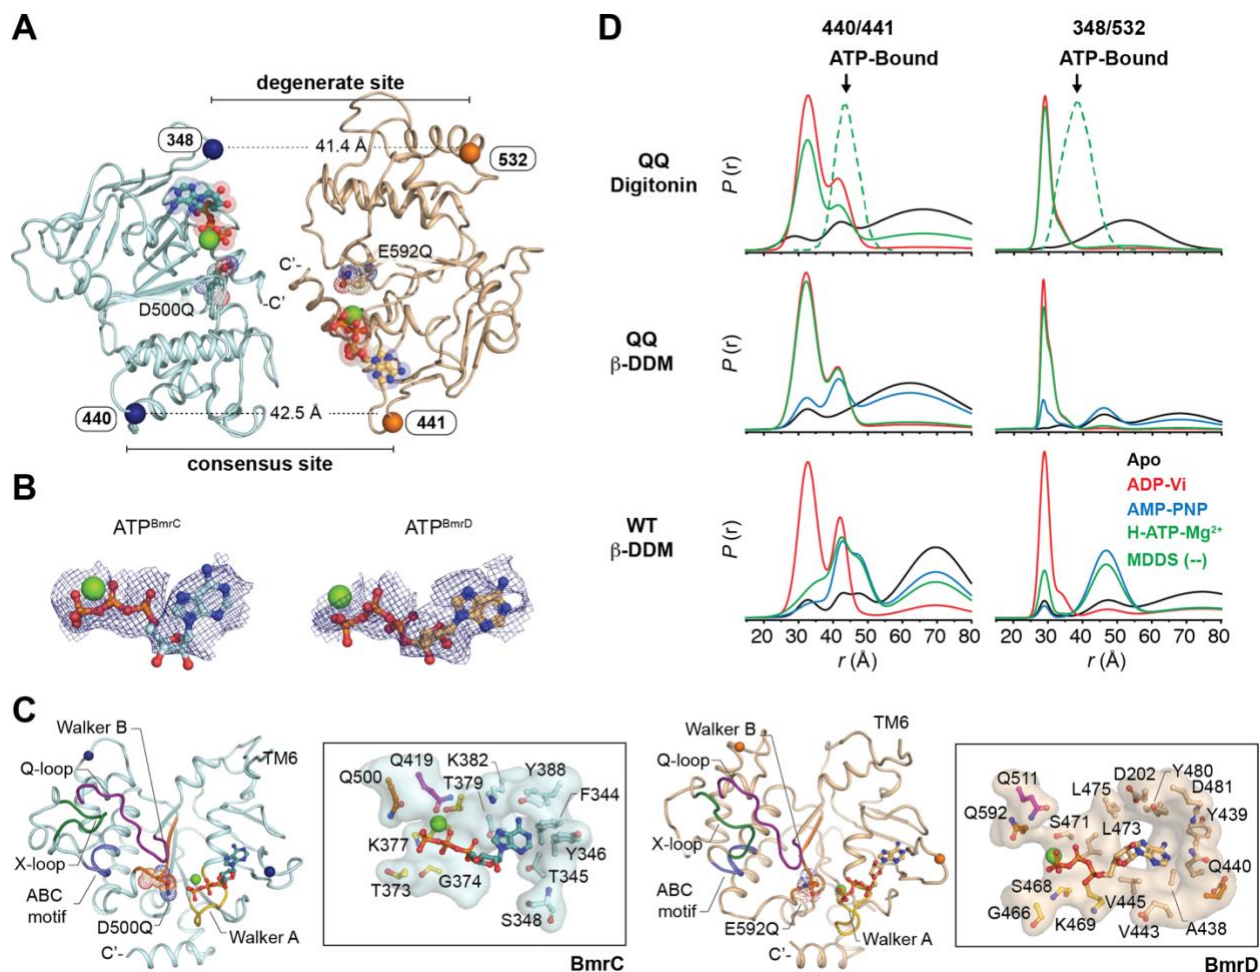

763

764

765

766

767

768

769

770

771

772

773

774

775

776

777

778

**Figure 2. Symmetric geometry of ATP-bound NBSs in BmrCD-QQ<sup>H/ATP</sup>.** **A)** Overview of the nucleotide binding domains in the cryo-EM structure of BmrCD-QQ<sup>H/ATP</sup>. **B)** Electron Potential Density corresponding to ATP bound in the BmrC (left) and BmrD (right) chains with symmetric geometries. **C)** Comparison of NBD secondary structure in BmrC (left) and BmrD (right) highlighting the architecture of conserved motifs and the orientations of ATP molecules relative to the position of the catalytic base (D500Q in BmrC; E592Q in BmrD). In the inset, an overview of the atomic features of the ATP binding pockets of each are shown with residues from conserved motifs colored the same. The orientations shown are of the same view in which BmrD was superimposed onto BmrC to highlight the symmetry of the ATP conformation in each. **D)** DEER distance distributions for spin labeled pairs in C-less wild-type and QQ-mutant of BmrCD consensus (440/441) and degenerate (348/532) nucleotide binding sites under varying conditions. Superimposed in dashed green lines (MDDS) are the distance distributions predicted by the structure.

779  
780

### Figure 3

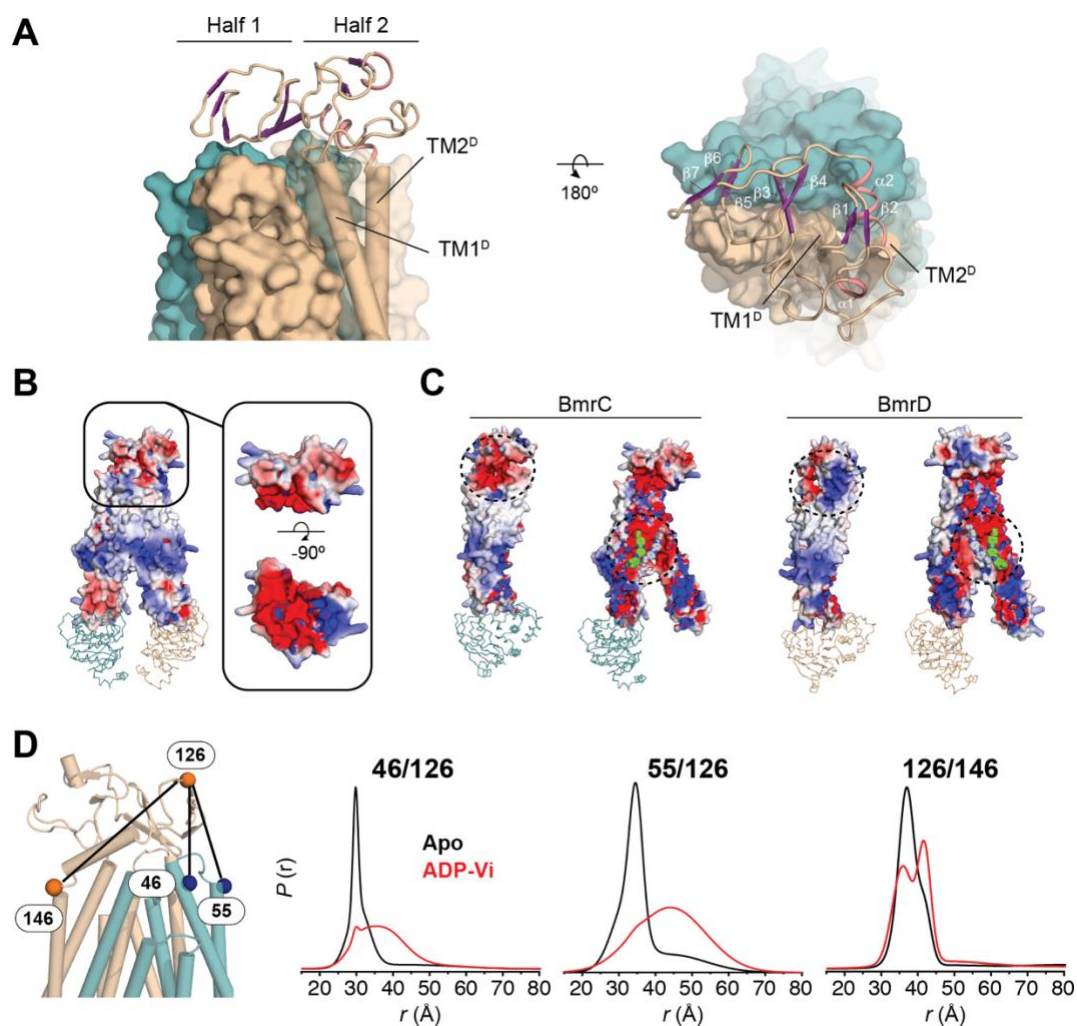

781

782 **Figure 3. A dynamic role of the ECD in BmrCD-QQ<sup>H/ATP</sup> catalysis.** **A)** Orientation of  
783 the ECD in BmrCD-QQ<sup>H/ATP</sup> relative to its TMD. **B)** Electrostatic distribution over the  
784 surface of the BmrCD-QQ<sup>H/ATP</sup> ECD and its interactions with **C)** BmrC (left) and BmrD  
785 (right). **D)** ECD/TMD spin labeled pairs generated in C-less BmrCD to monitor the ATP-  
786 dependent dynamics of the ECD.

787

788

**Figure 4**

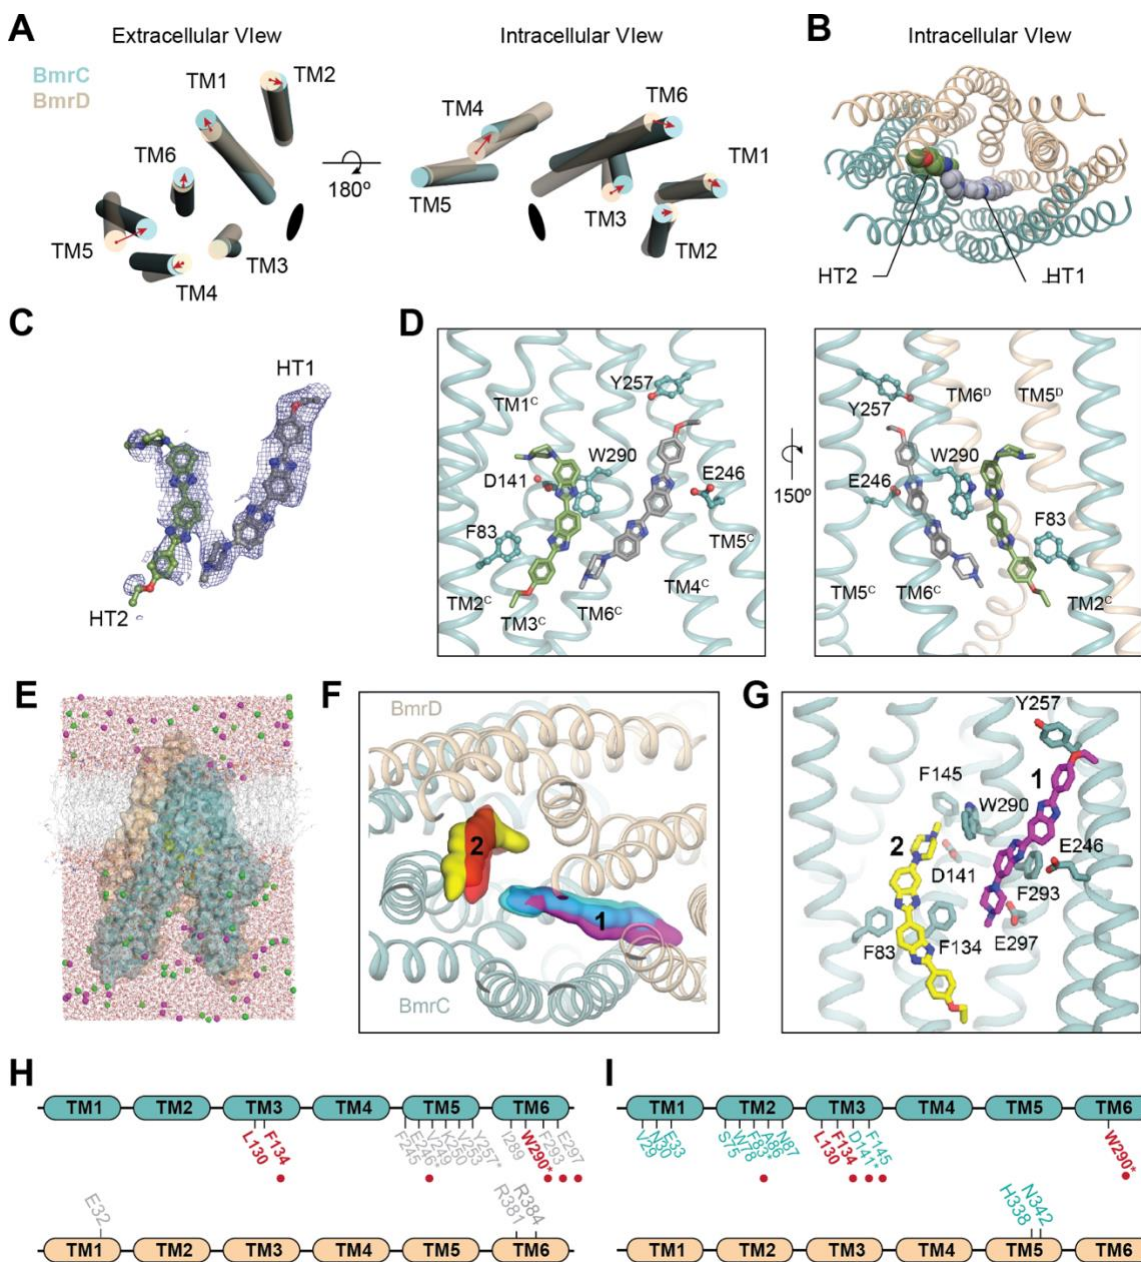

789

790

791

792

793

794

795

796

797

798

799

**Figure 4. Asymmetric binding of Hoechst-33342 in BmrCD-QQ<sup>H</sup>/ATP.** **A)** Superposition of BmrD transmembrane helices (TM1-6) onto BmrC shown from the extracellular (left) and intracellular (right) gates to highlight asymmetry in the TM arrangement observed in the structure of BmrCD. Red arrows correspond to the movement of each TM in BmrC relative to its position in BmrD. Black ellipse corresponds to the symmetry axis around which BmrD was rotated during superposition. **B)** Intracellular view of the arrangement of two molecules of Hoechst-33342 (HT1 and HT2) modelled in the TMD of BmrCD. **C)** Electron Potential Density observed corresponding to HT1 and HT2 and **D)** their positioning inside of the binding pocket. **E)** All-atom simulation system, comprising the transmembrane domain of BmrCD with two Hoechst molecules placed into the proposed



800 binding site, in a POPC lipid bilayer and 100 mM NaCl (BmrC, blue surface/cartoons;  
801 BrmD, orange surface/cartoons; Hoechst, yellow spheres; lipid, gray lines; water, red  
802 lines; sodium, magenta spheres; chloride, green spheres). **F)** Density maps calculated  
803 from the MD trajectories for each Hoechst molecule are overlaid onto the starting cryo-  
804 EM structure (magenta/red surfaces derive from one trajectory and cyan/yellow from the  
805 other). **G)** Snapshot representative of the calculated density maps, highlighting the  
806 configuration of the two Hoechst molecules and their seemingly most significant sidechain  
807 contacts with BmrC. Hydrogen atoms are omitted for clarity. Probability distributions for  
808 each of these interaction distances are shown in Supp. Fig. 6. The HT1 and HT2 specific  
809 interactions are summarized in **H)** and **I)**, respectively and mapped onto the respective  
810 chains colored the same as in **(A)** and **(B)**. Residues colored in red are observed  
811 interacting with both molecules in the cryo-EM structure. Residues with an asterisk were  
812 mutated in the study here and are shown as sticks in **(D)**. Red spheres correspond to  
813 residues identified as interacting with HT1 or HT2 in both the cryo-EM structure and all-  
814 atom simulation.  
815

816  
817

## Figure 5

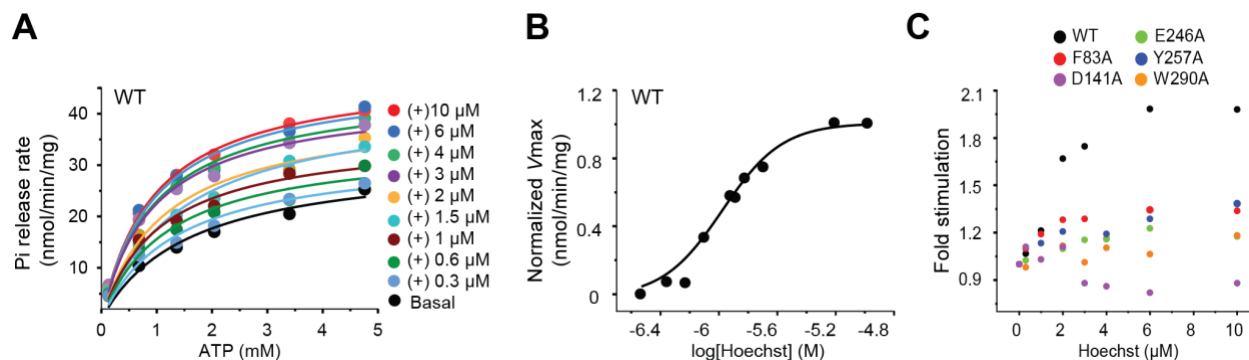

818

819

820

821

822

823

824

825

826

827

**Figure 5. Cooperative stimulation of ATP turnover by Hoechst-33342. A)** Hoechst-33342 concentration dependent stimulation of ATPase activity in wild-type C-less BmrCD (WT). **B)** Dose-response curve for Hoechst-mediated stimulation of ATPase activity highlighting cooperativity in wild-type C-less BmrCD (WT). The data is the average of two biological repeats and six technical repeats. **C)** Comparison of Hoechst-stimulated ATPase activity relative to basal activity (fold stimulation) in WT\* and alanine mutants of BmrCD. Mutants selected are of a subset of residues observed interacting with Hoechst-33342 in the BmrCD-QQ<sup>H/ATP</sup> cryo-EM structure (see Figure 4).

828 **Supplementary Materials**

829 **Supplemental Tables**

830

831

**Supplemental Table 1. RMSD analysis of domain architecture in BmrCD**

|             | RMSD (Å) |
|-------------|----------|
| TMD         | 3.07     |
| <i>TM1</i>  | 2.2      |
| <i>TM2</i>  | 1.41     |
| <i>TM3</i>  | 8.58     |
| <i>TM4</i>  | 4.99     |
| <i>TM5</i>  | 2.07     |
| <i>TM6</i>  | 1.86     |
|             |          |
| ICLs        | 2.36     |
| <i>ICL1</i> | 1.32     |
| <i>ICL2</i> | 1.19     |
|             |          |
| NBD         | 2.85     |

832

TMD: transmembrane domain; ICLs: intracellular loops; NBD: nucleotide-binding domain

833

834

**Supplemental Table 2. BmrCD vs. TmrAB RMSD Analysis**

|         |             |       | TMD RMSD (Å) |         |         |         | NBD RMSD (Å) |         |
|---------|-------------|-------|--------------|---------|---------|---------|--------------|---------|
| overall |             |       | A vs. D      | B vs. D | A vs. C | B vs. C | A vs. D      | B vs. C |
| IO      | <i>5mkk</i> | 5.025 | 2.639        | 3.513   | 3.776   | 2.775   | 2.099        | 1.232   |
|         | <i>6raf</i> | 5.424 | 2.285        | 3.612   | 4.247   | 3.813   | 2.232        | 1.394   |
|         | <i>6rag</i> | 3.624 | 2.253        | 2.442   | 3.133   | 2.002   | 1.851        | 1.55    |
|         | <i>6ran</i> | 3.404 | 2.159        | 2.293   | 2.927   | 1.882   | 2.316        | 1.467   |
| OO      | <i>6rah</i> | 7.589 | 5.976        | 6.563   | 6.948   | 6.268   | 2.765        | 1.434   |
|         | <i>6rai</i> | 6.731 | 4.731        | 5.297   | 5.557   | 3.097   | 2.683        | 1.592   |
|         | <i>6raj</i> | 7.607 | 5.937        | 6.499   | 6.943   | 6.407   | 2.773        | 1.648   |
|         | <i>6rak</i> | 6.757 | 4.799        | 5.371   | 5.696   | 3.291   | 2.687        | 1.627   |
|         | <i>6ral</i> | 6.399 | 4.381        | 4.899   | 5.225   | 3.011   | 2.824        | 1.593   |
|         | <i>6ram</i> | 6.059 | 4.029        | 4.271   | 4.822   | 2.887   | 2.712        | 1.373   |

835

IO: inward-facing open; OO: outward-facing open or occluded

836

837

838

## Supplemental Figures

839

### Supplementary Figure 1

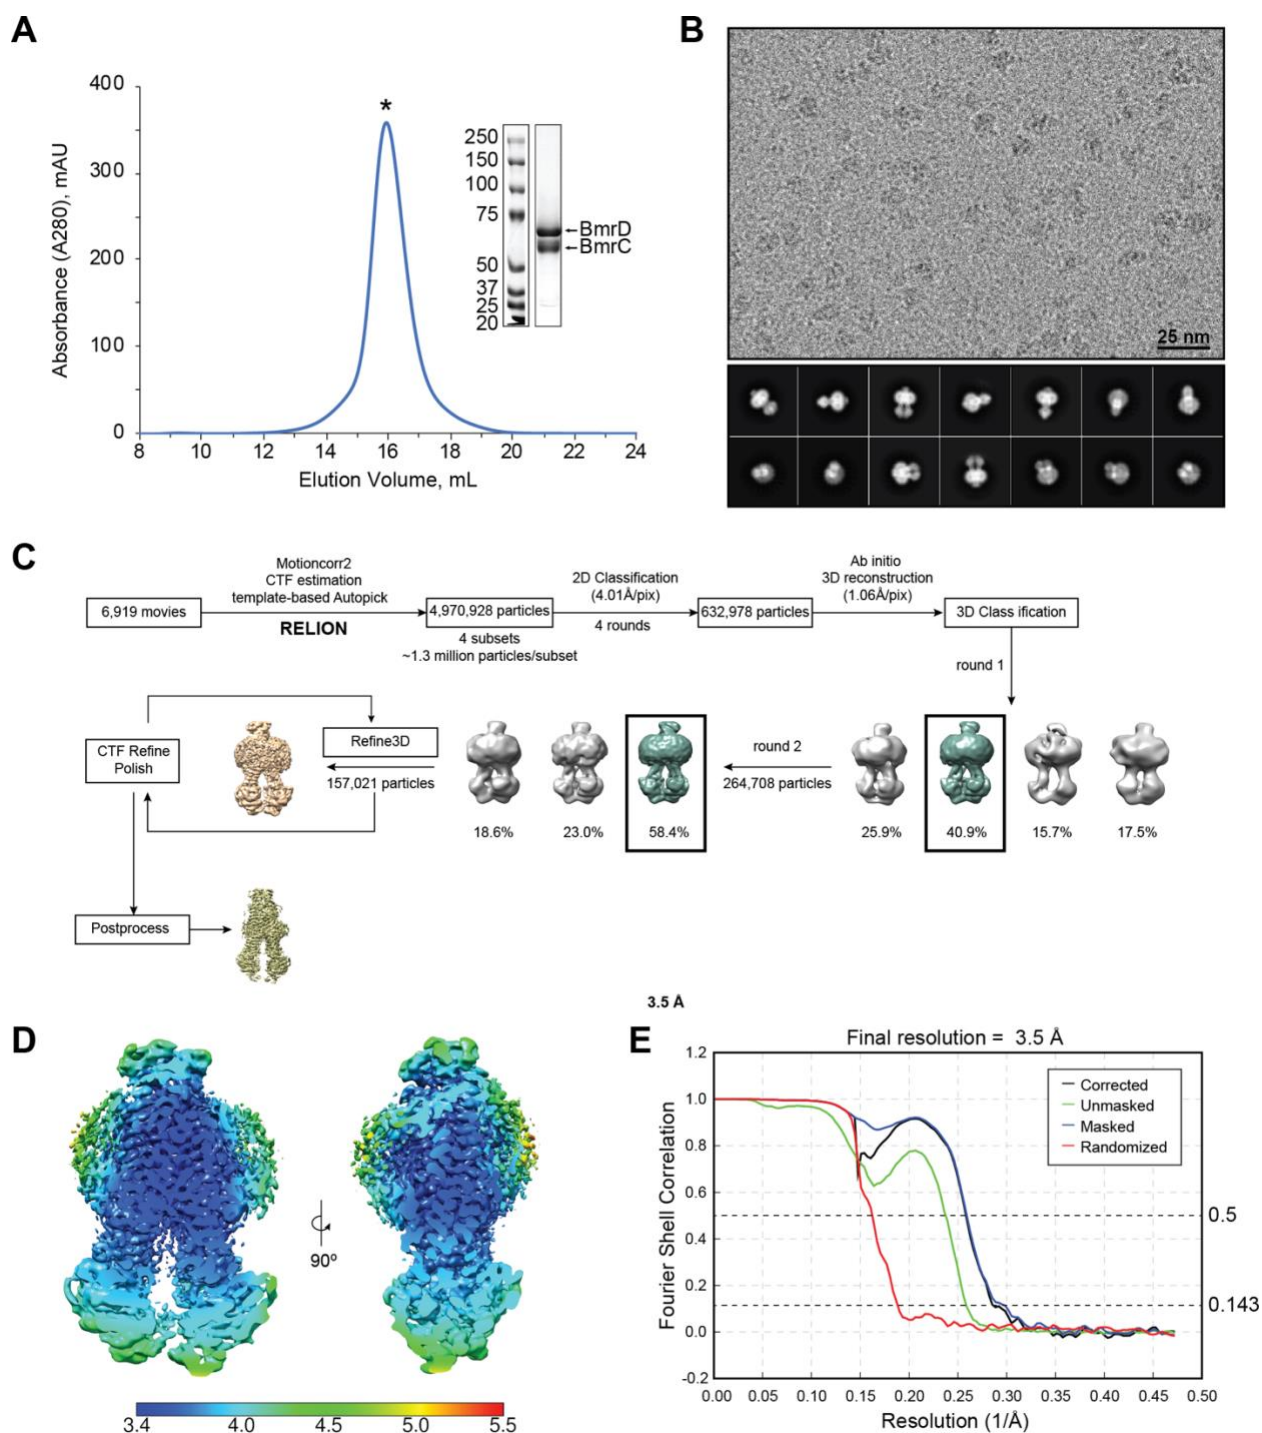

840

841

842

843

**Supplementary Figure 1. Cryo-EM data processing of BmrCD-QQ in the Hoechst-33342 and ATP/Mg bound state. A) Chromatogram and SDS-PAGE analysis of the peak composition for BmrCD-QQ purified by size exclusion chromatography over a**

844 Superose 6 column equilibrated in 0.02% digitonin containing buffer prior to sample  
845 preparation for cryo-EM data collection. **B)** Representative micrograph and 2D  
846 classification results from cryo-EM data collected for BmrCD-QQ in the presence of  
847 equimolar ATP/MgCl<sub>2</sub> and excess Hoechst-33342. **C)** Flowchart of data processing in  
848 RELION 3.1<sup>40</sup>. **D)** A slice through the EM volume colored according to local resolution. **E)**  
849 FSC curves calculated in RELION 3.1.  
850

851

## Supplementary Figure 2

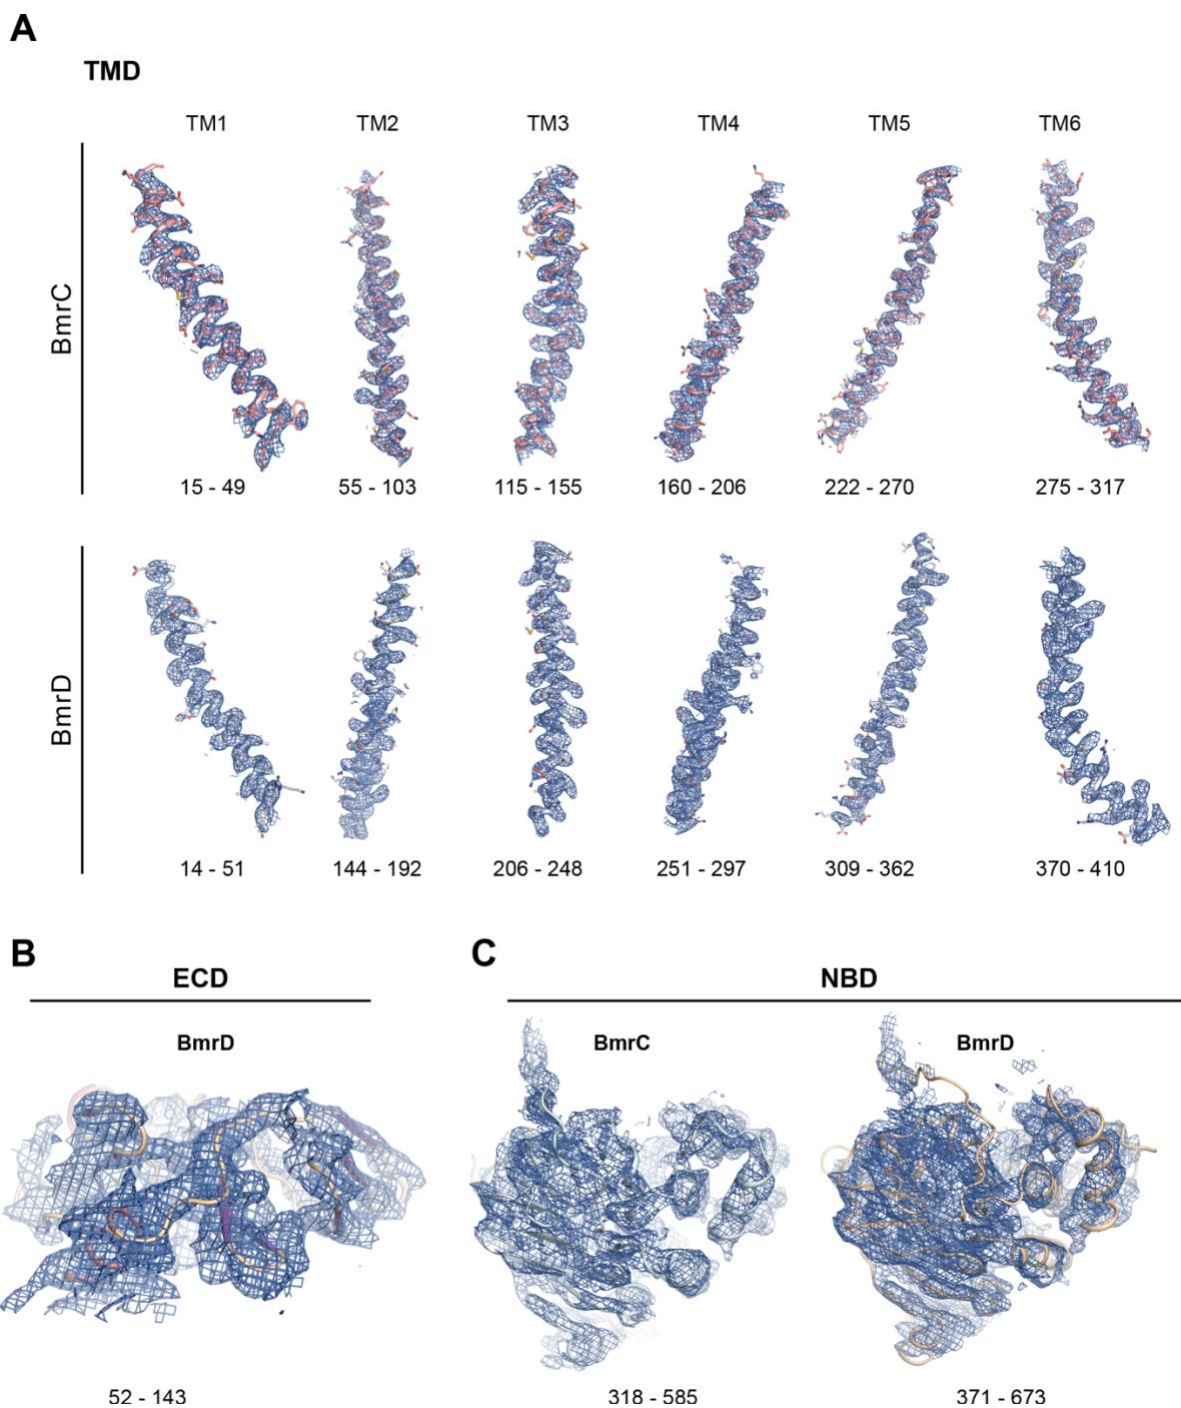

852

853

854

855

856

**Supplementary Figure 2. Cryo-EM map data quality.** Model and corresponding density of BmrCD-QQ **A**) transmembrane helices (TM1-6), **B**) extracellular domain (ECD), and **C**) nucleotide binding domains (NBD).

857

### Supplementary Figure 3

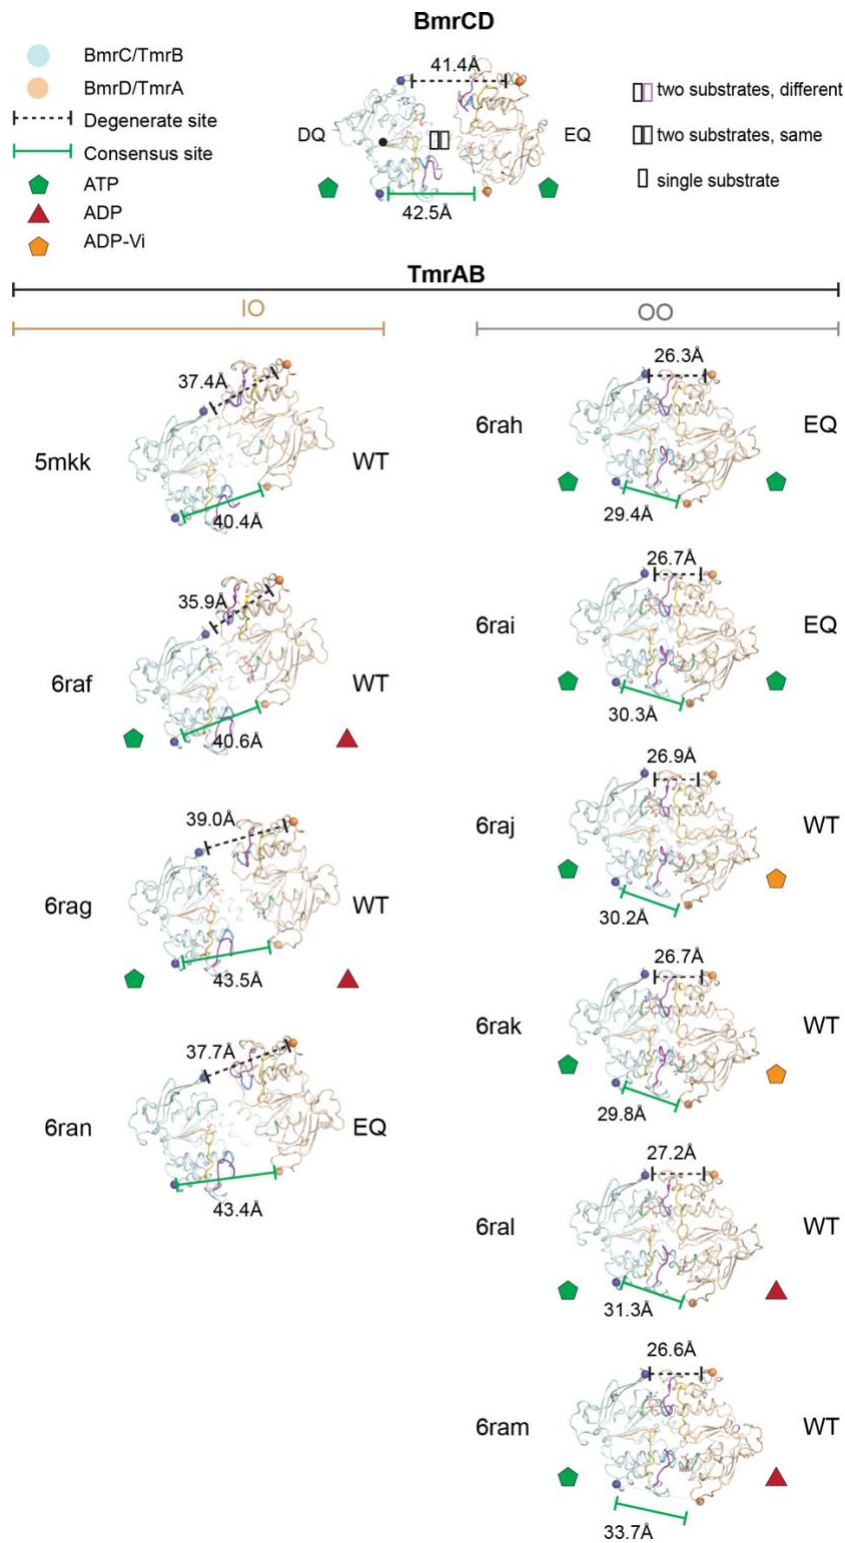

858

859

860

**Supplementary Figure 3. Analysis of NBD symmetry in BmrCD compared to TmrAB.** Comparison of NBD geometry between BmrCD and different states of TmrAB

861 determined by x-ray crystallography (PDB ID: 5mkk<sup>18</sup>) and cryo-EM<sup>2</sup>. The noncanonical  
862 NBD in BmrC and TmrB are colored *cyan*, whereas the consensus NBDs of BmrD and  
863 TmrA are colored *orange*. The orientations shown are relative to BmrCD and in which  
864 TmrB was aligned to BmrC (marked with a black dot in the center to denote the reference  
865 orientation). Structures of TmrAB are shown grouped by architectures adopting inward-  
866 facing open states (IO) or outward-facing states (OO).



867

## Supplementary Figure 4

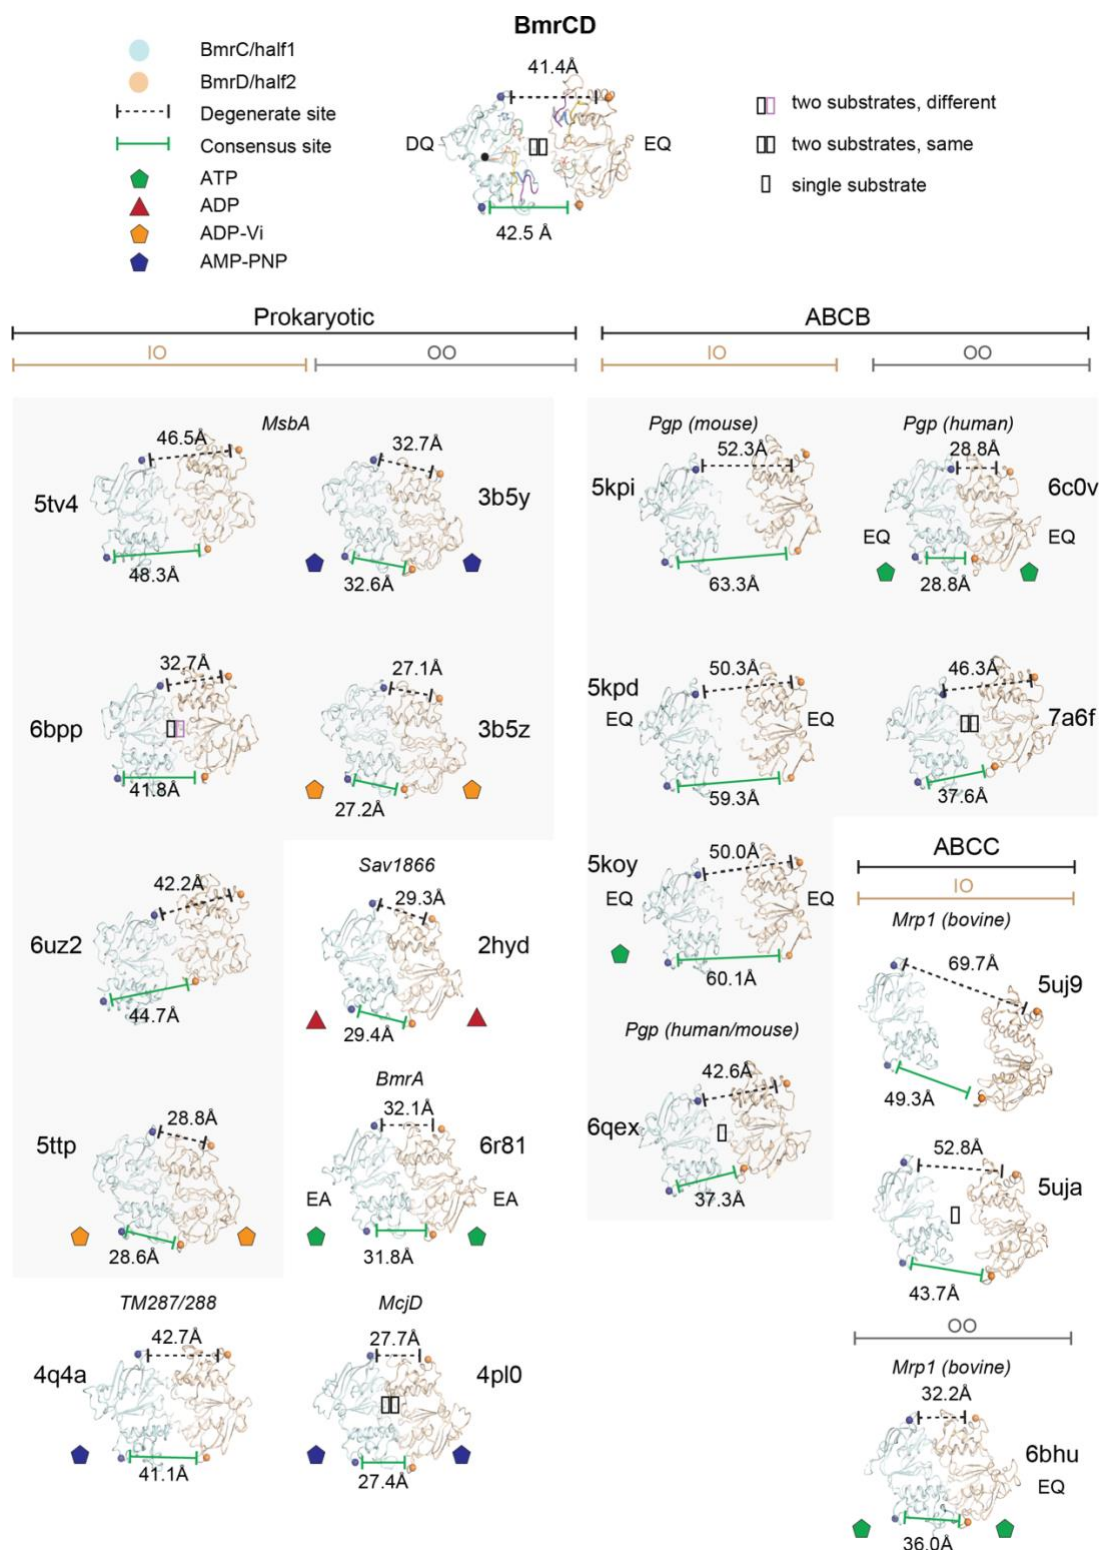

868

869

870

**Supplementary Figure 4. Analysis of NBD symmetry between BmrCD and other representative ABC transporters. Comparison of NBD geometry between BmrCD and**

871 structures of related ABC transporters from bacteria (MsbA PDB IDs: 5tv4<sup>19</sup>, 6bpp<sup>20</sup>,  
872 6uz2<sup>21</sup>, 3b5y<sup>23</sup>, and 3b5z<sup>23</sup>, TM2987/288 PDB ID: 2hyd<sup>24</sup>, BmrA PDB ID: 6r81  
873 (unpublished); McjD PDB ID: 4pl0<sup>6</sup>) as well as from the ABCB (or Pgp) and ABCC families  
874 . The noncanonical NBDs, or the first NBD (half 1) in homomeric or single polypeptide  
875 transporters, are colored *cyan*, whereas the consensus NBDs, or the second NBD in  
876 homomeric or single polypeptide transporter, are colored *orange*. The orientations shown  
877 are relative to BmrCD in which half 1 was aligned to BmrC (marked with a black dot in the  
878 center to denote the reference orientation). Structures are shown grouped by  
879 architectures adopting inward-facing open states (IO) or outward-facing states (OO).  
880

881

## Supplementary Figure 5

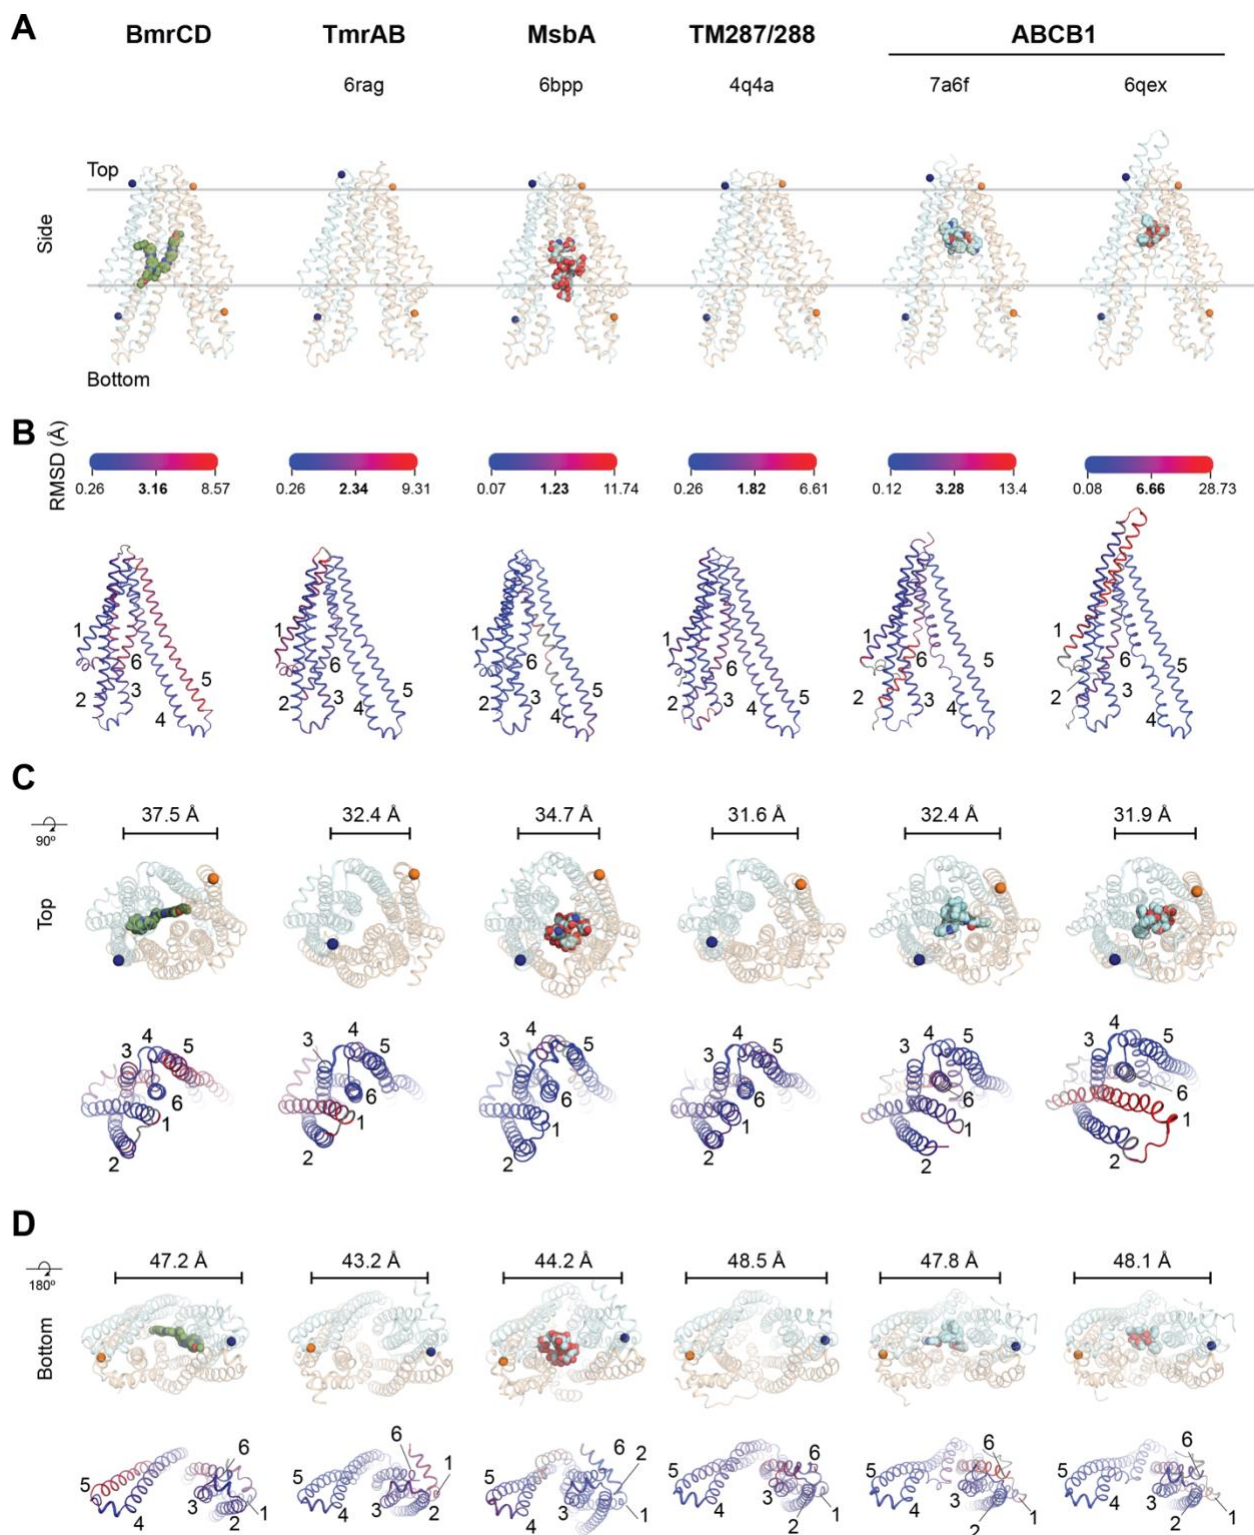

882

883

884

**Supplementary Figure 5. Analysis of BmrCD TMD in comparison to closely related ABC exporters. A)** Overview of the transmembrane domain (TMD) geometry in BmrCD

885 and related inward-facing states of related prokaryotic (PDB IDs: 6rag<sup>2</sup>, 6bpp<sup>20</sup>, and  
886 4q4a<sup>22</sup>) and occluded human ABC transporters bound with inhibitor (PDB ID: 7a6f<sup>13</sup>) or  
887 substrate (PDB ID: 6qex<sup>12</sup>). The extracellular domain of BmrD and both nucleotide binding  
888 domains have been omitted for clarity. Sites on the extracellular and intracellular gates  
889 labeled for DEER experiments in BmrCD and the homologous residues in the related  
890 exporters are shown as spheres and colored the same as Figures 1 of the main text,  
891 where the non-canonical nucleotide-binding site containing half are colored *cyan* (BmrC  
892 in BmrCD), and the canonical NBS containing half are colored *orange* (BmrD in BmrCD).  
893 **B)** The C $\alpha$  RMSD resulting from superposition of each TMD half within each structure is  
894 mapped onto the structure of the non-canonical half. The scale bar above represents the  
895 minimum, median, and maximum RMSD calculated for each superposition. The geometry  
896 and RMSD distribution in each are shown for the **C)** outside-facing (top) and **D)** inside-  
897 facing (bottom) regions of the TMDs to highlight the variation in asymmetry in each  
898 structure. Numbers in the RMSD representation correspond to the transmembrane helix  
899 number.  
900

901

## Supplementary Figure 6

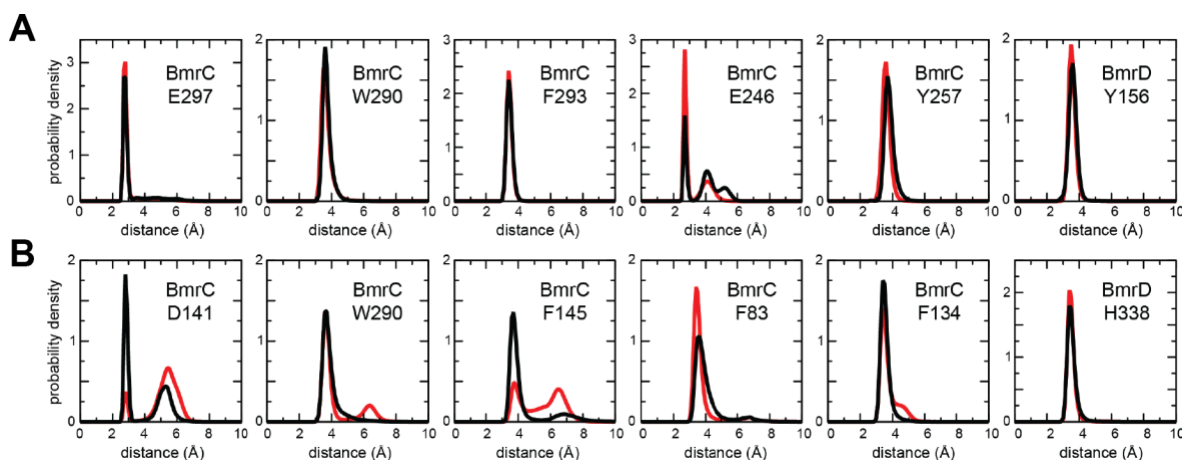

902

903

904

905

906

907

908

909

910

**Supplementary Figure 6. Examination of the Hoechst-33342 binding pose with MD simulations.** Data is shown for two independent MD trajectories (*black, red*) of the BmrCD construct shown in Fig. 4E, with two Hoechst molecules bound. **A)** Quantification of ionic and aromatic interactions between Hoechst molecule '1' and residues in BrmC, in terms of probability distributions of the minimum distance between the ligand and each sidechain (excluding hydrogens). The only significant contact of Hoechst molecule '1' with BrmD is also indicated. **B)** Same as **A)**, for molecule '2'.

911

## Supplementary Figure 7

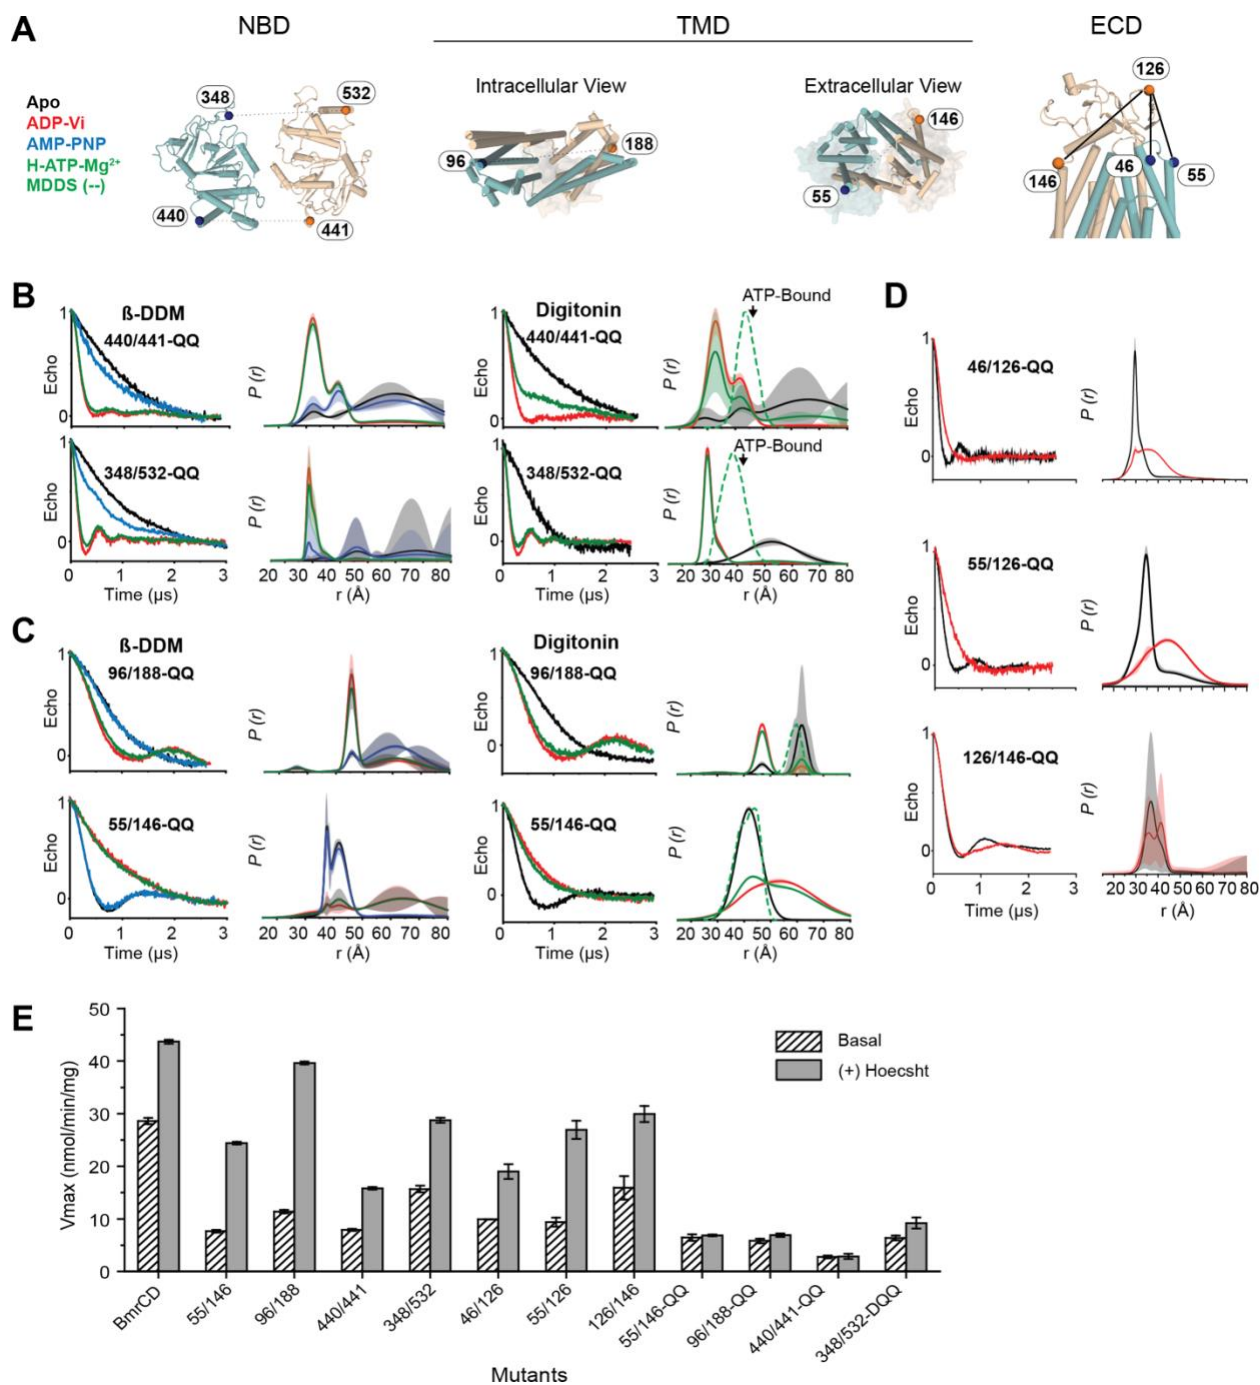

912

913 **Supplementary Figure 7. A)** Cartoon representations of BmrCD subdomains  
 914 highlighting the position of spin-labeled cysteine pairs generated in the nucleotide binding  
 915 domain (NBD), transmembrane domain (TMD), and the extracellular domain (ECD).  
 916 DEER decay signals and distance distributions for spin-labeled Cysteine pairs generated  
 917 in the **B)** NBD, **C)** TMD, and **D)** ECD for wild-type and mutant (QQ) C-less BmrCD. The  
 918 shaded regions represent confidence bands. **E)** Quantification of maximal ATPase rates  
 919 ( $V_{max}$ ) in wild-type and C-less spin-label mutants of BmrCD.
